# Supplementary material for: Structural features stabilized by divalent cation coordination within hepatitis E virus ORF1 are critical for viral replication
Source: eLife journal article supplement (doi:10.7554/elife.80529), 2023-02-13
Supplement: data1 [file Supplementary figure 5 - Source Data.xlsx]

## Sheet: Sheet1
	Mock										ORF1-WT										ORF1 WT-HA										ORF1 C434A										ORF1 D248A
D0	58	82	67	63	82	72	77	77	58		159	67	63	212	87	77	135	72	77		67	53	67	63	72	63	48	58	72		67	63	77	72	82	67	92	77	77		72	63	67	82	72	72	67	87	63
D1	72	63	63	72	77	72	72	72	77		58722	97133	99295	119332	125542	137663	149071	140105	140959		18281	15316	15539	13924	11530	10273	16496	17643	17778		4292	3896	3127	2513	2078	1967	2006	2078	1928		347079	457449	449905	399108	584988	601358	316961	433812	407957
D2	82	63	67	63	63	77	67	72	72		216025	388149	361371	475395	489589	469097	336644	405247	420346		98509	77055	81260	65071	54936	53358	77181	94418	85941		6241	6207	5008	4041	3311	3282	3606	3171	3103		1007619	1568483	1542597	1083083	1688396	1953170	1588093	1820806	1760023
Wash	72	96	67	63	72	67	82	72	63		299	493	319	575	652	744	333	396	459		406	150	121	87	101	101	135	121	96		87	87	77	72	77	72	58	63	77		1189	647	967	1092	2040	2151	1711	1740	2359
D3	63	63	77	72	63	58	82	63	63		171455	273219	231912	283322	330601	311902	234443	304858	349120		96386	72230	75180	50521	42834	48585	77786	78276	73586		246	179	179	188	164	121	154	111	135		726098	988924	1009924	943651	2021150	2124152	1033739	1011703	1042464
D4	63	72	58	72	67	72	72	82	63		583979	928432	840765	825726	1035877	969448	860774	1023750	1233881		364684	248352	248459	166146	142304	172213	279344	262174	251171		285	246	309	232	212	159	150	164	203		2839005	3556591	3407900	3366131	5030646	5239963	3617429	3674837	3426933
