# Supplementary material for: Structural features stabilized by divalent cation coordination within hepatitis E virus ORF1 are critical for viral replication
Source: eLife. 2023 Feb 28;12:e80529. doi: 10.7554/eLife.80529 (PMC9977285; doi:10.7554/eLife.80529)
Supplement: Figure 1—source data 1. — Spreadsheet of raw Gaussia luciferase (GLuc) data kinetics for (b–c) point and double mutant bearing replicons, (d) Kc1/p6 genotype 3 HEV replicons, (e) SHEV3 genotype 3 replicons, (f) SAR55 genotype 1 HEV replicons, (g) Tw6196E genotype 4 replicons, and (h) alternate codons of Kc1/p6 genotype 3 HEV replicons. [file elife-80529-fig1-data1.xlsx]

## Sheet: Figure 1 b, c
Time Post Transfection [Days]	Mock							WT							Pol -							C483A							C483S							Y590A							Y590F
0	232	145	135	541	164	174		164	145	155	145	155	155		145	135	174	155	155	193		145	126	155	425	522	184		261	155	155	512	184	184		135	135	126	135	184	164		135	174	106	155	164	135
1	193	126	135	280	184	155		95950	84207	60971	474552	362172	344719		1508	1576	1440	7966	9320	9523		2871	2059	1992	8924	9301	8605		1808	2552	2446	4892	8073	6100		174	126	145	145	184	135		1005	1179	1141	174	126	155
2	155	164	164	213	155	174		362687	283725	240848	2627358	1867369	1854194		1866	2233	1818	13836	14077	15914		3345	2485	2146	15750	17442	13836		2204	2968	2688	7715	13468	9968		116	164	145	174	155	164		1005	1121	1150	155	193	184
Wash	155	106	164	203	135	164		7183	5424	4157	2311	2253	2765		145	155	135	242	193	222		145	135	164	203	232	174		164	174	164	174	164	155		126	126	106	126	145	145		145	135	145	155	155	164
3	155	135	145	164	174	126		247678	234814	135945	4637157	3769774	2788326		309	261	232	10094	2446	1905		367	261	222	2127	2069	1624		416	541	464	1276	1711	1305		145	155	135	580	174	164		242	290	309	155	1595	174
4	174	135	164	184	184	155		930950	822099	458997	21800302	16235288	11866253		377	358	329	42328	4805	3113		425	329	309	3297	3007	2601		609	686	667	1963	2340	1885		164	126	155	1208	222	193		319	338	377	135	1731	232
[truncated: 12 more columns]

## Sheet: Figure 1, e
Time Post Transfection [Days]	Naive										SHEV3 WT										SHEV3 Pol (-)										SHEV3 C483A
0	63	63	82	77	82	67	77	72	67		77	77	77	77	77	72	53	63	58		82	63	63	58	77	72	63	67	53		116	63	67	130	82	67	125	67	67
1	77	77	72	72	63	67	77	72	77		1445	1648	1223	1759	1585	1416	1991	918	788		135	198	179	183	241	232	232	135	164		217	357	232	304	382	304	96	67	63
2	72	67	82	77	87	87	77	72	67		27316	26504	22281	30568	29314	22121	4360	2832	2025		179	256	227	188	256	241	270	179	208		333	826	502	430	788	710	82	82	77
Wash	63	67	63	63	77	63	63	77	77		212	125	111	198	169	179	67	72	63		77	67	67	72	63	53	72	72	77		72	82	63	77	67	77	72	63	77
3	63	67	63	96	67	67	77	72	72		60993	60417	46014	71513	72714	46697	851	420	425		67	72	77	1315	121	92	82	72	63		193	367	193	121	169	174	82	67	67
4	67	67	67	77	72	77	67	63	67		186937	187550	145643	202319	227226	142551	1648	889	788		77	72	67	130	92	77	87	67	87		551	996	580	164	285	246	77	72	77

## Sheet: Figure 1, f
Time Post Transfection [Days]	Naive										SAR 55 WT										SAR55 Pol (-)										SAR55 C483A
0	130	92	72	130	92	72	111	67	72		63	58	63	63	58	63	77	77	58		63	72	77	63	72	77	72	77	63		77	72	82	77	72	82	72	67	63
1	92	67	72	92	67	72	72	72	67		61478	49461	49872	61478	49461	49872	46319	38571	32029		353	440	382	353	440	382	328	295	266		623	517	551	623	517	551	541	430	411
2	72	67	67	72	67	67	92	72	72		191866	197097	172233	191866	197097	172233	119419	139144	133310		483	585	507	483	585	507	493	415	382		831	749	778	831	749	778	638	628	531
Wash	82	72	67	82	72	67	87	77	82		280	328	246	280	328	246	280	343	198		67	63	67	67	63	67	72	72	67		77	82	82	77	82	82	82	77	82
3	77	63	67	77	63	67	77	67	63		54278	66049	66568	54278	66049	66568	25294	59865	51358		67	77	92	67	77	92	72	87	82		96	87	101	96	87	101	72	77	92
4	92	72	72	92	72	72	82	63	63		88999	130797	128948	88999	130797	128948	47602	114147	98088		92	82	96	92	82	96	92	87	72		101	96	87	101	96	87	87	87	82

## Sheet: Figure 1, g
Time Post Transfection [Days]	Mock										TW6196E WT										TW6196E Pol (-)										TW6196E C483A
0	135	63	63	111	72	82	116	72	67		63	72	58	72	63	63	72	67	67		72	77	63	63	72	58	72	72	77		58	58	72	63	67	58	67	67	77
1	96	58	77	92	87	58	92	67	63		10326	10225	9258	8436	7232	2905	3326	2745	2552		991	1131	667	1184	1029	618	203	275	251		1445	1909	1363	1392	962	938	701	739	498
2	77	67	82	67	67	72	72	67	63		29242	30166	29851	21763	744	498	13600	11371	11022		1203	1315	971	1445	1179	865	266	357	367		1856	2296	1319	1532	1300	1247	855	865	623
Wash	87	82	63	72	72	58	67	72	87		140	106	125	96	87	125	87	92	92		67	67	58	72	67	58	77	77	72		67	77	82	82	63	72	67	72	72
3	67	63	58	67	67	67	67	82	67		10665	10911	10737	6052	5148	4524	5564	5810	4684		67	77	77	77	72	67	72	67	72		87	82	77	82	67	92	67	67	72
4	72	67	58	72	58	77	67	77	58		23485	25943	24574	13261	11496	11167	16342	14301	13585		96	63	82	72	67	72	67	77	72		92	77	87	82	63	87	82	72	63

## Sheet: Figure 1, h
Time Post Transfection [Days]	Mock							WT							Pol -							C483A (GCT)							C483A (GCA)							C483A (GCC)							C483A (GCG)
0	203	213	193	222	106	135		203	203	213	155	155	126		213	164	213	97	116	135		222	271	261	164	164	174		213	193	193	164	155	116		213	193	193	135	145	145		213	213	184	145	164	135
1	203	184	222	106	135	106		410601	420892	405048	131169	192821	179802		11863	12598	10248	11805	12134	11041		21852	18023	17355	19077	18738	18380		4070	9049	10944	5192	7783	7763		5414	5694	7087	6245	5888	6294		7647	9774	11776	9339	10896	11331
2	242	222	232	126	135	135		3586297	3795427	3281873	687000	1052386	1055449		21030	18245	16572	18371	18516	16127		38323	32200	30943	32810	31291	31717		8170	17094	20430	9156	12491	12859		8585	8672	11786	9301	8788	9649		11457	14164	19028	13632	15934	17065
Wash	232	213	203	126	155	126		18061	5636	4921	1218	2668	2040		319	242	193	164	126	155		222	213	242	155	164	126		184	193	222	164	145	164		184	184	193	145	164	155		174	193	222	135	174	145
3	213	184	193	126	116	126		1260580	2732443	2962961	360452	735906	689138		493	696	648	677	802	532		822	802	744	648	619	358		532	764	677	851	1402	1257		493	532	290	1644	1808	1895		512	445	648	957	938	1025
4	164	213	222	126	126	126		4223905	9290930	10136919	2276720	4169254	3573314		619	918	860	1644	2117	2059		1208	1208	1102	3335	3509	3345		909	1083	1063	1025	1092	715		686	696	319	986	822	532		715	570	1044	1344	1228	1615
[truncated: 6 more columns]
