# Supplementary material for: Structural features stabilized by divalent cation coordination within hepatitis E virus ORF1 are critical for viral replication
Source: eLife. 2023 Feb 28;12:e80529. doi: 10.7554/eLife.80529 (PMC9977285; doi:10.7554/eLife.80529)
Supplement: Figure 2—source data 1. — Spreadsheet of raw Gaussia luciferase (GLuc) data kinetics for transduced HepG2C3A cells (mock, ORF1 WT, ORF1 Pol [-], ORF1 C483A, and HEV pPCP domain) transfected with HEV Kc1/p6 replicons (WT, Pol [-], and C483A). Each sheet corresponds to different transduction condition. [file elife-80529-fig2-data1.xlsx]

## Sheet: Naïve HepG2C3A
RNA Transfection Condition	Mock	0	1	2	w	3	4		WT	0	1	2	w	3	4		GAD	0	1	2	w	3	4		C483A	0	1	2	w	3	4
		174	106	1518	101	82	92			77	54098	521563	831	972835	2842224			77	623	1242	67	174	217			92	734	2571	67	672	1092
		82	87	111	72	67	72			72	44799	473150	701	969383	2531792			67	744	1634	77	169	179			92	676	2513	82	904	1498
		67	92	92	67	67	87			77	38600	402478	1136	776518	2242038			72	638	1469	82	179	212			87	691	2832	63	705	1218
		130	101	63	67	82	72			67	11288	57594	241	340321	1531571			67	154	493	72	135	179			77	198	923	72	304	594
		82	72	87	67	72	87			63	13532	364102	246	394183	1609194			72	188	556	82	111	164			82	212	880	67	343	662
		67	77	77	67	77	72			67	8281	201532	164	315336	1750563			72	145	319	67	96	140			87	145	430	77	241	522
		174	101	82	77	72	63			72	1005	6623	72	7623	57260			67	145	227	67	67	72			58	116	232	72	77	101
		82	87	63	67	53	63			72	807	5578	72	8146	55619			58	154	251	63	82	72			67	101	261	72	92	121
		67	67	72	67	67	63			63	807	5361	77	7043	40352			63	106	164	63	77	67			58	96	212	63	87	116

## Sheet: ORF1 WT Transduced
RNA Transfection Condition	Mock	0	1	2	w	3	4		WT	0	1	2	w	3	4		GAD	0	1	2	w	3	4		C483A	0	1	2	w	3	4
		125	106	96	72	72	82			82	18595	241423	328	300864	621728			63	623	12666	92	20690	36233			82	3011	35106	82	22170	36596
		72	63	67	67	77	53			63	16279	259650	193	339437	672345			63	1962	26460	121	27703	44891			67	2605	41402	106	25822	44741
		77	72	67	82	63	67			82	10839	218370	232	304336	607902			72	1382	21101	101	21957	34990			77	2165	35338	87	20191	37453
		140	92	72	77	77	77			67	17362	246594	797	371300	660480			63	952	13909	77	24046	38179			63	2199	31661	82	21720	33616
		72	58	63	63	67	63			63	16032	269603	565	334287	594156			72	1759	20278	87	26949	38880			82	2083	27529	87	17628	26905
		63	67	58	67	72	82			77	14649	211847	285	306180	636466			82	1121	18736	72	22571	33122			77	1890	20965	82	14480	22953
		125	101	87	82	58	72			67	1025	23679	101	75543	167953			63	556	12096	67	16414	31225			63	967	15263	77	13165	23476
		53	67	58	63	82	63			63	730	19282	101	59667	139988			58	507	9707	77	11095	24516			58	749	11728	72	9939	19142
		48	63	72	63	72	67			63	512	13634	92	54505	158365			67	440	8276	77	11037	23427			72	488	9253	67	8450	17691

## Sheet: ORF1 Pol (-) Transduced
RNA Transfection Condition	Mock	0	1	2	w	3	4		WT	0	1	2	w	3	4		GAD	0	1	2	w	3	4		C483A	0	1	2	w	3	4
		140	96	92	77	92	82			63	1382	4307	77	1851	10602			72	241	324	77	96	87			77	324	551	67	174	251
		77	67	82	82	63	58			77	1170	4234	72	1677	5375			67	324	435	63	82	77			77	246	415	77	130	145
		82	67	77	67	63	77			63	1054	3611	101	1489	6231			72	266	367	72	72	87			63	275	546	58	135	169
		154	101	87	77	77	77			72	1087	4655	82	2151	7541			72	121	164	67	72	96			72	198	362	67	135	203
		67	72	58	72	63	63			87	899	3427	96	1672	7111			58	154	208	63	82	92			77	164	304	67	111	154
		58	72	87	72	82	63			72	942	3301	82	1924	9088			67	150	203	82	77	87			82	145	256	72	106	145
		116	101	67	72	67	63			72	1421	9862	106	8745	35246			67	237	420	63	82	130			63	415	1005	58	174	237
		72	72	58	53	67	72			67	1344	8469	77	8305	30645			82	275	527	63	82	121			77	386	971	67	198	319
		63	63	67	58	63	72			77	957	5888	67	6574	28381			63	309	531	58	82	135			58	328	763	82	145	208

## Sheet: ORF1 C483A Transduced
RNA Transfection Condition	Mock	0	1	2	w	3	4		WT	0	1	2	w	3	4		GAD	0	1	2	w	3	4		C483A	0	1	2	w	3	4
		130	101	67	67	63	72			82	1542	8005	77	6115	21212			67	145	270	72	77	111			72	251	449	58	101	130
		77	67	67	63	67	77			63	1199	6453	67	4046	13547			87	246	454	77	87	96			72	270	604	77	130	203
		72	72	67	67	63	67			63	971	5772	82	3572	14112			87	241	440	72	82	101			72	222	488	67	96	140
		106	92	72	82	77	77			63	1348	7348	101	6163	19408			67	183	270	72	87	106			67	261	536	77	145	212
		77	67	63	72	58	82			67	1155	7420	82	5714	18489			63	212	420	67	92	121			72	227	406	72	116	183
		63	58	67	82	82	72			63	1358	8107	92	10191	53213			72	222	377	67	72	101			72	203	324	63	87	135
		130	92	87	92	77	72			63	1479	8300	77	5738	26678			67	164	212	67	87	87			77	256	478	67	159	266
		77	63	58	82	72	67			63	1276	6598	77	3867	19413			77	203	309	58	87	92			72	246	541	72	145	227
		67	48	63	77	67	58			48	1121	5738	67	3200	15578			67	212	237	72	92	106			77	212	440	67	125	238

## Sheet: pPCP Domain Transduced
RNA Transfection Condition	Mock	0	1	2	w	3	4		WT	0	1	2	w	3	4		GAD	0	1	2	w	3	4		C483A	0	1	2	w	3	4
		140	82	82	96	82	87			58	4708	19089	111	7285	24704			77	174	251	58	67	77			82	266	454	58	111	179
		77	92	77	72	77	72			67	4602	18034	106	7522	21023			72	256	333	67	87	82			67	275	507	77	125	159
		58	67	82	77	67	77			72	3988	16085	96	6826	21923			67	256	304	72	87	72			53	275	440	72	116	193
		121	87	82	67	72	67			58	4070	17531	101	8629	25096			67	188	261	63	87	96			82	227	319	72	101	140
		72	77	72	67	72	72			63	4234	18532	101	9262	30664			72	227	328	72	87	92			67	183	367	77	121	198
		77	72	63	67	92	82			77	4094	18958	121	8697	31211			67	203	270	67	82	82			63	174	275	82	106	125
		111	82	87	72	82	63			82	2368	8136	67	1290	5612			77	111	159	63	58	77			63	285	478	67	82	116
		72	67	53	67	67	63			77	1102	4679	77	2098	7546			72	130	232	92	72	72			58	188	309	67	87	106
		67	67	82	72	63	67			67	759	3089	77	1295	1629			67	154	203	67	72	72			72	261	266	67	72	92
