# Supplementary material for: Structural features stabilized by divalent cation coordination within hepatitis E virus ORF1 are critical for viral replication
Source: eLife. 2023 Feb 28;12:e80529. doi: 10.7554/eLife.80529 (PMC9977285; doi:10.7554/eLife.80529)
Supplement: Figure 3—source data 1. — Spreadsheet of raw Gaussia luciferase (GLuc) data kinetics for Kc1/p6 conserved cysteine point mutant replicons and alanine scanning mutagenized triplets. [file elife-80529-fig3-data1.xlsx]

## Sheet: Conserved Cysteine Raw Data
	Mock										WT										GAD										C434A										C457A
D0	338	174	203	217	96	72	63	63	72		203	203	184	58	63	67	72	77	72		164	193	193	63	72	67	67	67	77		309	213	193	130	77	77	145	72	67		193	213	222	63	87	67	63	63	63
D1	251	155	184	111	72	77	72	72	63		314953	268523	314137	6357	8499	4829	155456	162493	169823		8585	9455	10132	222	212	208	1493	1663	1551		1007887	905944	1042225	36200	68050	72864	547781	1410230	1424932		25459	22113	29521	604	657	527	4307	4984	5076
D2	222	184	145	101	58	72	77	67	87		604303	527660	696884	54476	74138	56616	352905	435619	363047		10867	12076	14213	570	522	469	1672	1890	2064		2221393	2073307	2218967	230501	424865	410692	1550003	4350372	4586990		31910	30372	37588	1165	1518	1170	5283	5888	5965
Wash	193	203	203	87	67	63	67	92	77		1498	1363	1295	135	121	140	183	498	261		222	203	213	67	67	58	77	72	77		1663	1943	3915	783	1203	1073	5743	14151	18866		222	232	300	72	77	58	67	82	67
D3	164	193	164	82	58	72	67	77	63		76939	115586	120554	253124	254351	216050	381041	341258	362328		280	261	309	121	125	116	111	116	116		300628	287113	270746	1107049	1747238	1500656	1878980	4762050	4668678		493	493	512	188	256	203	217	324	324
D4	203	184	203	72	63	67	72	87	82		210779	402160	404727	400321	397431	341156	718139	626444	690143		319	300	319	140	116	130	111	101	121		1028523	946401	950968	1503694	2373968	2157138	4193915	9584288	9462934		580	609	493	222	270	222	270	411	415

## Sheet: Raw Data_Alanine Scan
	1	2	3	4	5	6	7	8	9	10	11	12	13	14	15	16	17	18	19	20	21	22	23	24	25	26	27	28	29	30	31	32	33	34	35	36	37	38	39	40	41	42	43	44	45	46	47	48	49
	1QCR	4RWL	7SAG	10FHL	13DPR	16VLV	19FDE	22SVP	25CRC	28RTF	31LKK	34VAG	37KFC	40CFM	43RWL	46GQE	49CTC	52FLE	55PAE	58GLV	61GDH	64GHD	67NEA	70YEG	73SEV	76DQA	79EPA	82HLD	85VSG	88TYA	91VHG	94HQL	97VAL	100YRA	103LNV	106PHD	109IAA	112RAS	115RLT	118ATV	121ELV	124AGP	127DRL	130ECR	133TVL	136GNL	139TFR	142TTV	145VDG
D0	72	63	77	377	92	82	459	116	72	101	82	299	121	251	415	92	111	67	92	338	106	150	72	125	92	53	415	87	67	96	63	87	353	67	77	116	82	58	304	67	101	87	67	275	174	67	87	92	63
	72	63	72	72	96	67	135	106	77	92	72	63	106	63	106	116	106	82	676	125	121	67	82	96	96	77	121	101	77	96	82	82	135	77	72	121	63	67	77	82	77	72	77	87	164	77	67	82	58
	82	72	63	72	96	67	111	121	67	101	67	92	1518	67	111	121	92	72	116	101	121	77	87	82	106	77	106	106	67	96	67	92	251	72	67	130	67	82	82	77	92	77	72	77	184	67	77	77	63
	82	82	63	82	67	53	87	67	63	246	63	77	87	92	237	72	77	67	261	82	72	227	72	256	63	63	72	261	53	72	72	63	285	58	72	67	63	275	77	77	92	241	77	87	92	681	256	72	67
	63	58	67	63	63	63	67	77	72	82	53	63	82	67	63	67	77	63	77	72	82	77	67	77	72	82	72	77	77	58	67	67	87	67	77	63	63	77	82	92	72	72	77	77	96	67	63	87	67
	77	67	67	58	82	53	67	63	63	67	67	77	72	67	67	72	72	53	67	63	77	72	58	67	82	58	77	77	72	77	72	77	63	67	87	72	63	72	72	106	72	82	67	67	111	63	87	82	58
	63	48	92	96	77	63	72	145	82	193	290	82	63	92	512	184	184	63	213	406	203	125	87	193	174	246	367	213	203	164	77	483	237	58	184	155	67	82	67	246	155	96	67	227	72	53	67	324	101
	72	72	82	67	63	58	67	184	72	184	77	67	77	72	164	184	184	77	174	184	213	58	67	184	203	72	145	184	145	174	58	174	72	63	193	174	72	101	63	77	193	87	72	67	77	58	67	87	72
	67	63	92	63	67	63	67	222	72	174	58	58	63	53	155	184	203	67	203	164	213	53	63	174	232	63	193	184	184	155	77	193	72	87	164	164	58	63	77	67	193	77	67	67	82	63	63	82	77
D1	333	517	478	691	643	522	2368	108410	464	14581	1334	51097	730	193	2044	3422	2325	831	497054	111480	175643	217	377	3190	34317	238405	98684	8513	96	3084	159	2765	9881	1194	111	739	1150	505266	444	1213	1745	99139	1484	1924	3592065	440	464	1522	145
	367	522	788	730	754	512	1928	117106	546	14741	1556	62703	778	193	1798	3587	1890	865	383690	77292	173093	256	551	2881	42220	265389	154334	9335	82	4022	203	2895	9828	1281	111	860	1242	374428	904	1261	1919	193072	2359	3214	3762690	386	454	2683	130
	333	536	459	730	720	488	1619	91679	541	12318	918	65560	807	280	1682	4549	2001	846	456361	88088	167278	188	440	2112	36393	266519	123776	11598	67	2987	222	2634	12019	1184	82	778	1228	251220	831	1242	1406	202626	2407	2876	3445041	411	411	2480	125
	96	92	159	130	96	87	1402	2354	193	227	63	1170	87	145	174	106	96	96	82166	18233	34032	353	101	203	3055	8919	16114	705	256	343	188	169	15723	169	817	241	145	59270	343	314	488	25836	565	507	516748	251	154	246	111
	116	96	130	159	77	101	1440	2562	159	193	72	2576	222	275	116	150	145	67	208782	16177	65391	430	82	179	3243	15887	10515	701	246	309	140	125	22353	154	875	193	174	194137	299	720	435	41707	435	1058	457404	454	140	232	82
	121	82	106	140	77	92	1150	1619	154	208	63	2397	101	256	106	140	179	82	41305	15215	10660	382	77	295	705	24661	2837	759	193	464	111	121	16782	154	836	145	111	130559	237	643	314	33470	275	802	572759	396	111	72	101
	116	154	725	227	125	116	92	503	304	3219	164	10935	116	164	2929	3036	1382	183	100268	45752	44852	121	121	4428	40993	3069	42434	2620	3306	5240	101	3103	1271	92	4950	1847	130	16095	116	270	6526	14485	333	140	88137	217	106	1426	1295
	111	135	730	324	121	125	101	512	241	4612	362	3471	92	188	3654	1363	1905	121	47426	57604	57255	111	125	5163	46342	3161	2707	3065	2659	5694	92	9775	2165	82	5656	2746	92	30084	96	343	6700	32541	121	135	64616	203	125	2687	1218
	111	111	793	285	111	125	96	512	232	4882	159	6299	101	140	3161	1382	1740	116	42028	56211	54130	101	111	4650	41709	2852	78206	2697	4747	7502	82	8740	1310	72	4795	2214	77	19069	77	246	6361	10873	179	96	24385	164	125	2576	1170
D2	246	338	488	440	623	560	2702	338070	338	47089	1856	96255	831	164	2852	4660	2977	696	1422142	379027	613684	266	459	5366	78644	494165	319772	20907	169	4573	1639	4302	25193	1025	145	971	860	1159597	328	1034	2223	281299	2272	1513	7019623	473	319	1658	241
	246	391	672	527	817	517	2286	369404	372	45085	1793	129496	1020	290	2547	4230	2697	768	1533259	224403	646583	367	647	4984	92513	554565	610185	22716	150	4858	217	4785	20491	981	164	971	870	882346	739	1126	2151	401574	2141	2828	7409192	425	343	2460	241
	256	348	343	507	841	420	1764	253772	299	38184	1116	131689	933	299	2204	5946	2668	633	1198356	290414	549023	319	502	4176	68902	565951	495533	28478	121	3790	193	4167	31516	952	125	962	913	560604	676	1382	2262	396589	2054	2480	6472199	483	328	2151	227
	111	121	256	241	111	111	894	22794	449	1131	87	10457	135	203	188	227	203	183	262729	94665	142614	314	183	353	12173	79942	86072	2654	478	541	328	459	21333	343	1561	280	261	216424	609	464	705	102722	1039	1484	1516442	633	159	623	188
	140	101	241	353	106	145	971	29450	367	1750	125	30011	319	527	309	256	440	159	766650	81590	117358	541	174	435	6033	112964	46276	2683	411	440	227	299	32237	367	1460	290	295	934996	585	1136	638	229270	947	1890	1261327	918	159	609	174
	164	92	222	295	116	145	841	9678	401	3403	116	15258	169	473	256	208	357	130	423729	78145	82171	406	125	483	3906	140619	24080	3949	454	541	208	256	23393	290	1266	212	188	756601	415	1087	473	163294	570	1435	1980399	797	150	101	154
	183	261	672	478	145	174	130	909	701	5201	174	54704	232	275	2514	2997	1460	333	172251	88883	78294	125	174	6197	62442	29305	58784	2900	3393	6884	188	2765	8489	125	5047	1963	227	202490	198	290	5984	76997	657	174	376310	493	169	1054	1131
	135	169	744	575	164	179	150	851	701	7309	909	34898	159	304	3258	1450	1527	198	79736	116138	94885	159	159	5897	65529	41382	1237	3355	3287	7676	188	9252	10099	111	2146	2639	198	273311	140	251	6342	121602	246	261	324657	502	198	2528	1141
	145	164	676	556	164	212	164	880	623	8150	348	54457	179	285	2929	1247	1469	169	81168	119489	88505	145	154	6400	59433	42592	116080	2417	4544	6835	135	8295	7546	87	1856	2127	150	166816	101	241	5598	56718	193	154	122194	435	183	2359	1087
Wash	63	63	87	96	77	96	169	164	67	227	72	198	87	82	150	96	116	67	1658	502	1083	77	96	125	203	1363	333	92	77	116	67	92	135	87	43	87	77	851	101	87	111	744	87	106	22790	82	82	82	67
	77	58	63	72	96	72	92	280	72	101	77	382	101	72	92	96	87	87	1571	198	2025	58	82	125	125	1063	604	101	63	96	67	92	145	72	63	101	72	933	96	67	101	817	82	87	8866	67	67	92	67
	72	77	67	77	101	58	96	338	63	125	77	367	87	63	82	106	96	87	1648	473	11844	58	67	101	227	1141	802	101	77	145	72	106	212	77	63	106	63	570	87	67	232	1049	92	87	10654	72	72	87	77
	87	67	58	63	53	58	63	82	58	72	63	67	82	72	101	58	63	53	333	101	338	116	58	87	53	77	67	96	67	67	82	63	111	67	58	67	72	159	77	87	67	130	77	72	95271	63	87	82	67
	67	63	58	53	72	63	87	77	63	63	58	72	67	58	67	72	67	63	295	140	82	67	72	72	77	77	67	48	77	72	63	58	96	72	72	67	77	618	77	87	82	150	72	63	36035	58	53	82	63
	72	67	67	72	63	63	67	67	63	63	63	87	58	67	67	63	63	72	159	111	87	67	67	82	72	82	77	67	53	82	63	63	121	92	77	67	72	309	72	72	72	96	82	63	2557	72	82	77	77
	67	53	92	77	67	67	67	155	67	174	96	125	58	87	203	174	203	58	706	338	638	87	72	222	232	111	271	174	174	184	72	213	101	77	164	174	96	111	82	106	203	179	77	101	154	72	67	111	92
	67	72	106	82	48	67	63	145	77	155	101	82	58	67	174	174	164	58	232	512	1150	53	82	174	454	87	135	174	164	155	72	174	72	77	174	193	77	101	77	82	203	111	87	77	188	82	63	87	77
	58	67	87	67	67	63	77	155	63	193	72	111	53	67	164	155	184	63	251	773	1073	72	67	174	338	87	387	135	164	193	67	232	77	72	164	174	67	116	67	67	164	111	72	72	96	72	67	106	87
D3	77	87	72	96	116	82	154	93235	87	15462	280	36108	96	77	179	164	188	116	325008	127439	285383	92	222	362	16400	201342	54404	2944	63	154	77	299	2504	111	58	101	125	657074	96	440	121	223245	188	241	423101	72	87	198	82
	67	96	82	82	106	77	135	78155	77	13010	343	49988	121	63	145	179	183	159	337587	109729	303024	92	246	430	9746	214906	149746	3359	72	130	67	290	2417	111	77	111	116	505143	116	309	125	207518	183	270	628459	87	72	237	63
	82	77	77	82	121	72	135	60403	82	9171	246	47476	121	72	130	159	1774	125	293530	128632	142920	101	145	502	6081	222121	139105	4713	72	121	72	314	5767	121	67	96	101	314897	121	188	116	204026	208	237	537648	77	82	208	67
	67	72	77	82	67	53	96	8324	87	367	72	4703	82	72	72	58	72	72	157840	88534	86217	87	77	116	1870	50560	35740	807	63	87	67	87	4563	92	145	82	72	71615	92	309	77	66311	106	154	456092	111	82	96	58
	77	67	67	67	58	53	101	9669	82	730	58	14141	72	92	77	67	77	58	418482	72908	46343	67	77	145	1295	41528	16854	841	58	77	72	87	5931	82	150	92	72	713316	208	179	77	128142	101	145	334511	92	87	111	63
	63	72	72	67	67	63	87	4418	67	928	63	7063	96	77	77	72	63	63	243862	49533	35546	92	77	130	517	55023	6908	1793	63	72	72	67	5549	87	135	82	63	413344	92	270	67	85554	101	130	530812	82	72	72	63
	67	82	111	92	63	58	82	483	96	812	96	31709	67	58	203	184	193	72	21243	40954	40664	63	77	1073	11051	20656	6129	271	174	261	67	203	2591	77	203	213	82	196339	72	96	184	47074	77	101	144658	87	63	101	92
	67	63	92	87	77	72	72	290	92	841	241	28018	63	63	213	174	203	87	14077	55001	25034	82	72	474	6178	31361	135	387	193	213	67	251	3258	63	319	155	72	182889	96	92	193	50124	82	82	109816	72	82	106	116
	82	72	87	87	63	72	63	396	106	1025	111	33819	67	63	184	193	203	82	11447	66835	17829	72	82	831	3103	29019	9223	280	242	261	77	261	1841	72	251	193	67	63473	72	106	174	22798	82	82	45854	77	58	111	82
D4	82	92	87	101	116	77	188	125319	101	21889	386	65076	121	87	188	179	208	125	545854	230939	405154	92	309	382	28434	418991	112212	4437	82	77	82	396	3780	135	77	101	140	1592075	106	870	169	568036	266	299	1320852	92	77	212	77
	92	101	77	96	135	96	130	137498	96	17401	546	87308	121	92	169	203	232	164	639938	192537	454318	87	299	599	10626	415893	223026	4872	67	154	87	493	2905	125	72	116	111	1224666	135	865	135	463926	232	377	2126561	82	87	285	72
	87	92	87	101	130	77	125	90085	82	13474	362	84633	130	87	169	183	203	169	488598	204016	225230	96	193	715	9180	402752	240289	7391	72	145	63	449	8431	135	67	106	125	727629	130	251	116	448381	295	343	1919603	87	77	275	63
	77	72	92	87	77	58	87	34811	106	2417	106	32875	96	77	77	87	96	116	476979	327341	330186	72	96	130	4568	199217	125663	3838	82	92	87	125	7580	101	135	72	67	358201	116	1363	87	253207	135	348	963042	212	77	145	72
	87	67	63	96	67	72	130	48875	106	4017	169	67953	92	116	72	77	101	92	1174734	278136	157588	92	106	198	3688	172879	68519	5496	67	77	77	125	9596	87	159	58	87	2436367	1431	266	92	509761	159	222	728379	154	72	135	58
	72	67	82	87	77	77	87	23930	116	4824	101	36659	87	92	77	82	92	92	556619	189363	121413	92	77	251	2160	185902	46939	7503	92	82	82	125	10616	77	183	87	72	2098563	212	609	72	384893	106	507	672409	145	77	135	72
	87	67	101	116	63	67	96	1063	130	1440	111	86348	72	82	203	193	193	140	41264	161630	93984	72	101	1818	11679	115942	13632	493	145	213	77	242	5467	63	203	203	92	681459	106	106	213	168429	101	116	693178	116	72	121	106
	67	77	116	130	72	67	82	406	169	1421	459	74226	67	788	193	155	184	111	34560	261788	58697	72	77	551	8305	172519	135	464	242	251	63	348	7488	82	338	203	116	734071	256	169	193	198527	96	135	473768	111	63	125	92
	63	67	106	125	72	72	63	822	164	1489	222	97399	77	67	174	184	193	96	26591	328474	53966	67	92	1382	5424	159229	24802	619	232	396	53	300	6449	77	271	193	67	321680	67	193	193	96260	87	82	233596	87	77	106	111
[truncated: 5 more columns]

## Sheet: Raw Data_Controls_Alanine Scan
	Mock	WT	GAD
D0	338	203	164
	174	203	193
	203	184	193
	111	531	101
	116	96	96
	92	82	111
	92	396	67
	82	67	72
	72	77	72
	77	227	72
	63	72	67
	72	63	72
	67	261	72
	72	63	67
	72	63	72
	82	275	77
	63	72	87
	82	72	63
	63	87	63
	63	67	58
	63	67	67
	237	72	101
	82	67	72
	77	82	82
	174	63	67
	58	63	53
	67	63	63
	217	58	63
	96	63	72
	72	67	67
	135	464	145
	145	164	174
	164	164	155
D1	251	314953	8585
	155	268523	9455
	184	314137	10132
	106	186325	2262
	96	176950	2837
	130	174662	3306
	72	108255	1397
	77	129108	1614
	77	119342	1508
	72	2131	111
	63	5714	111
	72	4433	135
	67	12976	420
	72	26180	401
	72	18015	324
	63	57207	604
	72	35198	696
	72	26228	507
	63	14668	251
	63	21449	266
	72	15897	212
	130	7865	319
	87	13261	377
	67	11801	517
	111	565	232
	72	324	77
	67	386	72
	111	6357	222
	72	8499	212
	77	4829	208
	145	2011	232
	155	2485	213
	135	2262	193
D2	222	604303	10867
	184	527660	12076
	145	696884	14213
	140	473993	2813
	125	446667	3408
	121	469440	3756
	77	178442	981
	77	229766	1054
	82	218662	1020
	58	9572	222
	82	36838	266
	67	29276	212
	67	50923	763
	72	96997	676
	72	67866	633
	101	151882	1107
	67	99130	647
	63	96202	604
	77	104662	527
	67	170610	464
	63	151232	454
	96	21531	386
	67	28715	435
	72	23147	498
	87	3582	154
	53	2451	188
	58	2035	130
	101	54476	570
	58	74138	522
	72	56616	469
	116	2494	251
	135	7899	222
	145	4205	213
W	193	1498	222
	203	1363	203
	203	1295	213
	125	522	96
	87	391	106
	106	478	125
	92	483	77
	67	440	77
	77	580	77
	63	92	77
	72	96	63
	67	82	72
	72	179	72
	67	145	67
	67	145	72
	77	270	67
	67	217	77
	77	319	58
	58	67	63
	67	72	63
	58	72	63
	101	92	87
	72	72	67
	87	63	87
	82	58	67
	72	58	77
	77	63	63
	87	135	67
	67	121	67
	63	140	58
	135	232	145
	135	174	116
	164	145	164
D3	164	76939	280
	193	115586	261
	164	120554	309
	130	142940	164
	101	115733	135
	116	136785	150
	92	65730	101
	72	81217	96
	101	74129	101
	67	9601	82
	63	35730	82
	87	34187	82
	72	22668	92
	72	33582	87
	82	30151	87
	72	20351	87
	63	21870	77
	72	21091	82
	63	60132	67
	77	87390	77
	67	77995	77
	92	4520	77
	82	5989	67
	82	4331	67
	72	4084	67
	77	2866	63
	58	2741	58
	82	253124	121
	58	254351	125
	72	216050	116
	126	445	155
	145	19637	155
	155	2011	203
D4	203	210779	319
	184	402160	300
	203	404727	319
	96	235991	145
	135	180993	159
	96	243726	174
	82	144687	125
	82	160837	106
	82	183564	130
	67	65676	82
	72	179987	121
	72	185737	82
	77	97360	92
	72	127191	106
	72	117373	116
	106	77326	111
	82	51915	87
	92	58969	96
	72	240275	106
	150	389729	96
	67	352471	106
	92	14683	87
	72	15316	82
	67	12807	82
	72	39960	72
	67	36538	67
	63	29861	72
	72	400321	140
	63	397431	116
	67	341156	130
	145	22896	126
	145	36795	126
	116	14938	155
