# Supplementary material for: Structural features stabilized by divalent cation coordination within hepatitis E virus ORF1 are critical for viral replication
Source: eLife. 2023 Feb 28;12:e80529. doi: 10.7554/eLife.80529 (PMC9977285; doi:10.7554/eLife.80529)
Supplement: Figure 4—figure supplement 2—source data 1. — Left: percent similarity and identity with SINV macrodomain (AAs 1342–1,509 of PDB: 4GUA; Shin et al., 2012). Right: percent similarity and identity with CHIKV macrodomain (PDB: 3DPG; Malet et al., 2009). [file elife-80529-fig4-figsupp2-data1.xlsx]

## Sheet: Macro Domain Alignment Scores
SINV vs. ORF1 macro domain
Matrix:	BLOSUM62
Gap open penalty:	10
Gap extended penalty:	1
Length (amino acids):	104
Identity (amino acids):	37/104 (35.58%)
Similarity (amino acids):	59/104 (56.73%)
Gaps:	11/104 (10.58%)
CJHIKV vs. ORF1 macro domain
Matrix:	BLOSUM62
Gap open penalty:	10
Gap extended penalty:	1
Length:	107
Identity:	39/107 (36.45%)
Similarity:	58/107 (54.21%)
Gaps:	17/107 (15.89%)
