# Supplementary material for: Structural features stabilized by divalent cation coordination within hepatitis E virus ORF1 are critical for viral replication
Source: eLife. 2023 Feb 28;12:e80529. doi: 10.7554/eLife.80529 (PMC9977285; doi:10.7554/eLife.80529)
Supplement: Supplementary file 1. — Spreadsheet tabs 1–3: raw ion reads for inductively coupled plasma mass spectrometry data for each of the independent experimental runs, organized by date of run. Spreadsheet tab 4: primer sequences for each construct generated for use int his manuscript. [file elife-80529-supp1.xlsx]

## Sheet: Run_1_3-7-22
	7Li (KED)	11B (STD)	23Na (STD)	24Mg (STD)	27Al (STD)	29Si (STD)	39K (STD)	44Ca (STD)	45Sc (STD)	48Ti (STD)	51V (STD)	52Cr (STD)	53Cr (STD)	54Fe (KED)	55Mn (STD)	56Fe (KED)	57Fe (KED)	58Fe (KED)	59Co (STD)	60Ni (STD)	63Cu (STD)	64Zn (STD)	66Zn (STD)	68Zn (STD)	75As (STD)	77Se (STD)	78Se (STD)	80Se (STD)	83Kr (STD)	85Rb (STD)	86Sr (STD)	88Sr (STD)	111Cd (STD)	118Sn (STD)	121Sb (STD)	135Ba (STD)	137Ba (STD)	202Hg (STD)	206Pb (STD)	208Pb (STD)	238U (STD)
	Y (ppb)	Y (ppb)	Y (ppb)	Y (ppb)	Y (ppb)	Y (ppb)	Y (ppb)	Y (ppb)	Y (ppt)	Y (ppb)	Y (ppb)	Y (ppb)	Y (ppb)	Y (ppb)	Y (ppb)	Y (ppb)	Y (ppb)	Y (ppb)	Y (ppb)	Y (ppb)	Y (ppb)	Y (ppb)	Y (ppb)	Y (ppb)	Y (ppb)	Y (ppb)	Y (ppb)	Y (ppb)	Y (ppb)	Y (ppb)	Y (ppb)	Y (ppb)	Y (ppb)	Y (ppb)	Y (ppb)	Y (ppb)	Y (ppb)	Y (ppt)	Y (ppb)	Y (ppb)	Y (ppb)
2% Blank	0	0	0	0	0	79.7627	0	0	32.78	0.0136798	0	0	0	0	0	0	0	0	0	0	0	0	0	0	0	0	0	0	0.167269	0	0	0	0	0.00283147	0	0	0	0.0594908	0	0	0
SRM1643-1X	16.2337	152.989	18311.9	7322.71	130.715	N/A	1886.78	28878.9	N/A	N/A	35.6191	18.158	18.2021	91.6604	36.5213	92.7952	91.4274	91.3143	24.937	58.6428	21.1026	73.5611	73.241	74.5425	56.7143	11.636	11.5533	7.73888	N/A	12.4423	309.39	310.396	5.79908	N/A	54.7549	512.123	510.03	N/A	18.3641	18.1859	25.0409
SRM1643-2X	8.48011	73.3422	9725.25	3795.42	69.6643	N/A	1005.39	15080.9	N/A	N/A	18.1895	9.46491	9.41788	47.8095	18.8684	45.8235	47.8576	48.143	12.7835	30.6371	11.2903	37.2245	37.7517	35.6264	28.881	5.79601	5.88196	10.0266	N/A	6.39132	159.109	157.137	2.9788	N/A	27.8287	259.595	262.872	N/A	9.04766	9.38627	12.4429
SRM1643-5X	3.4602	26.4326	4471.48	1542.15	27.6544	N/A	402.135	6039	N/A	N/A	7.06469	3.8119	3.77209	19.1895	7.61471	18.5008	19.9155	19.7861	5.11611	12.3528	4.63458	15.0087	15.2539	14.2595	11.3712	2.15967	2.33023	6.90153	N/A	2.5727	63.1954	63.3839	1.19719	N/A	11.1532	103.07	105.416	N/A	3.73678	3.76227	5.06159
SRM1643-10X	1.78205	11.0003	1627.02	649.521	11.6571	N/A	173.155	2542	N/A	N/A	2.96978	1.62391	1.52228	8.58328	3.21839	8.54245	9.21955	9.15463	2.12831	5.26738	1.96416	6.347	6.41317	6.03285	4.76044	0.928714	0.956269	7.15345	N/A	1.1022	27.1081	26.5271	0.509992	N/A	4.69799	44.8276	44.6944	N/A	1.58468	1.61817	2.24713
SRM1643-50X	0.430657	2.66591	398.435	157.529	2.94815	N/A	41.9106	612.395	N/A	N/A	0.676949	0.405557	0.282575	1.93282	0.774509	1.93364	1.93682	2.07646	0.513674	1.25037	0.473372	1.48597	1.52643	1.42772	1.13083	0.185221	0.326571	10.7356	N/A	0.265892	6.48245	6.51433	0.121071	N/A	1.11438	10.9147	10.8223	N/A	0.374329	0.397908	0.528795
Mock 1x	-0.0148502	1.67597	1851.83	27.0772	11.0817	89.1647	7.00444	65.0888	36.1604	0.672235	-0.0203112	0.214657	0.096689	79.3101	0.19088	90.6555	88.8174	0.723649	0.00640234	0.234073	0.947886	3.39891	3.54729	2.51668	-0.00149222	-0.0253722	0.0721709	19.7101	0.182606	0.00702463	1.68192	1.7516	0.00174413	0.0936986	0.0616138	0.499117	0.489163	0.0396605	0.0293301	0.0301164	0.000433482
Mock 2x	0	0.876036	929.487	13.9843	5.67951	88.392	3.21474	29.2812	34.7341	0.327542	-0.0272346	0.111867	-0.0108982	38.5686	0.0952607	42.8697	45.0379	0.350513	0.00341647	0.118671	0.476346	1.05758	1.09035	0.794219	-0.00557089	-0.0253718	0.111605	17.5939	0.172417	0.00279388	0.848974	0.885067	0.000906946	0.0472624	0.0302342	0.246187	0.257962	0.0198303	0.0147237	0.0156063	0.000254669
Mock 10x	-0.0148502	0.204803	154.168	2.36692	0.97333	88.2145	1.32662	7.04855	36.2776	0.0783377	-0.0347715	0.0338858	-0.094438	6.11903	0.0191681	6.80061	6.97447	0.105906	0.000712983	0.0458407	0.0809448	0.384272	0.385963	0.282994	-0.00795842	-0.0456699	0.02563	15.9684	0.170594	0.000780457	0.137584	0.147849	6.9765e-05	0.0139666	0.00641366	0.05048	0.0511704	0.0396605	0.00337546	0.00394792	8.12769e-05
ORF1 No Tag 1x	-0.0148502	1.57712	277.96	28.4226	11.0986	88.4744	4.61912	83.5587	37.7238	0.672872	-0.029842	0.141678	0.0107568	58.7057	0.175729	65.2081	66.7018	0.624712	0.00689255	0.244179	0.792282	2.40079	2.4605	1.77239	-0.00507352	-0.0570872	-0.0205103	32.737	0.172203	0.00705856	1.49634	1.51418	0.00230225	0.0716077	0.0282667	0.410963	0.410308	0.0594908	0.0787701	0.0763506	0.000444319
ORF1 No Tag 2x	-0.0148502	0.798089	139.19	13.4684	4.59048	86.3167	2.69399	36.843	36.7466	0.325335	-0.0384123	0.0762101	-0.0616105	28.4677	0.0877078	31.8242	32.7882	0.305101	0.00265888	0.101641	0.376244	1.1179	1.15144	0.809156	-0.00547145	-0.0494755	0.000390523	28.4495	0.173918	0.00397031	0.720811	0.73008	0.000627888	0.0351296	0.0210388	0.200502	0.204967	0.059491	0.0383587	0.039718	0.000265507
ORF1 No Tag 10x	0	0.189877	27.9625	2.76145	0.990213	87.2246	0.433276	7.79939	35.6328	0.0794259	-0.0425774	0.019994	-0.113854	6.12542	0.0180691	6.68251	6.96422	0.0584703	0.000415905	0.0201925	0.0821611	0.220173	0.239991	0.161124	-0.00835634	-0.0685045	0.0165584	32.7274	0.170808	0.000633412	0.131217	0.154826	0.00013953	0.0107905	0.00224473	0.045311	0.0488487	0.0396605	0.00761295	0.00808366	7.044e-05
L-HA-L WT 1x	0	1.81035	2098.01	27.8959	9.84617	86.538	9.49942	97.9612	33.4834	0.780416	-0.0240578	0.160737	0.0293393	66.3532	0.196453	73.084	74.3692	0.737296	0.0066549	0.274125	1.15929	4.95017	5.11706	3.67799	-0.00457612	-0.0494756	-0.0642898	42.4804	0.171023	0.00737534	1.54616	1.5889	0.00202319	0.0742493	0.0404146	0.432007	0.445	0.0198303	0.0894812	0.086444	0.000428063
L-HA-L WT 2x	-0.0148502	0.918688	1017.76	13.4478	4.7973	84.3221	1.88663	38.3252	34.0306	0.341776	-0.0332132	0.0798098	-0.0590954	33.272	0.0980447	36.5338	38.2652	0.326101	0.00334219	0.114394	0.572617	1.13314	1.14089	0.833344	-0.00925167	-0.0646988	-0.0579732	37.4072	0.163838	0.00315585	0.747497	0.78427	0.000558121	0.0385359	0.0177885	0.222912	0.226588	0.0198303	0.039508	0.0414064	0.000162554
L-HA-L WT 10x	0	0.224618	208.797	2.84893	1.02911	84.5789	-0.317138	10.7167	34.5777	0.100508	-0.0456636	0.0408517	-0.0982094	7.08294	0.0225903	7.44568	7.21026	0.368515	0.00415921	0.209661	0.128378	0.669654	0.688373	0.494531	-0.00905262	-0.0710417	-0.00157899	38.4269	0.132308	0.000689968	0.1187	0.16012	0.000348825	0.0259063	0.00489571	0.0509107	0.0516751	0.158642	0.0117548	0.0120088	5.96034e-05
L-HA-L C483A 1x	-0.0148502	1.83191	704.187	26.8127	9.57728	84.3561	2.23803	90.0195	36.1214	0.68736	-0.0405098	0.142955	-0.014391	57.6203	0.215124	63.8423	65.2677	0.613659	0.00695199	0.237318	0.862165	2.66676	2.76112	1.97202	-0.00815739	-0.050744	-0.0374692	43.4126	0.161263	0.00505627	1.62311	1.64908	0.00174413	0.0768523	0.0382973	0.382847	0.398883	0.0396605	0.0755354	0.0705189	0.000493086
L-HA-L C483A 2x	-0.0148502	0.895238	343.871	13.5786	4.6704	90.9353	0.313399	46.2098	34.7926	0.356546	-0.0458282	0.0700846	-0.0775355	27.5973	0.104675	31.262	32.1979	0.303737	0.00317879	0.112552	0.421077	1.33891	1.36905	0.991671	-0.00905269	-0.0900706	-0.0465401	42.039	0.179174	0.00237535	0.779264	0.800064	0.000976714	0.0400286	0.0189432	0.191797	0.201987	0.0594908	0.0352451	0.0357669	0.000254669
L-HA-L C483A 10x	0.0297004	0.21175	68.774	2.67962	0.926542	83.2443	-1.25796	9.08141	34.2455	0.0838038	-0.0502622	0.00943113	-0.150868	5.59138	0.021688	6.40672	6.42605	0.0576527	0.000698132	0.0213717	0.0931367	0.273906	0.293726	0.212068	-0.0112412	-0.0799219	-0.0824306	42.8475	0.1544	0.000463746	0.142287	0.164599	0.000279061	0.00948949	0.00463918	0.0420374	0.0422878	0.0198303	0.00739745	0.00801336	3.79296e-05
L-HA-L C563A 1x	-0.0148502	1.24612	1100.11	27.4686	9.88705	83.4008	2.10457	55.0427	33.4248	0.855544	-0.0477157	0.203941	0.0347893	68.0511	0.192119	76.3322	77.2602	0.673292	0.00723427	0.244399	0.901188	2.16863	2.19279	1.58472	-0.00815737	-0.067236	-0.116343	46.9971	0.173704	0.005373	1.46318	1.51579	0.00118601	0.077886	0.0390245	0.397334	0.390488	0.0991514	0.171904	0.169484	0.000568946
L-HA-L C563A 2x	0	0.630639	535.875	13.6895	4.7308	90.9105	0.212837	26.9272	32.7996	0.322798	-0.0521796	0.0936703	-0.0493173	33.5112	0.0948342	37.2738	37.4747	0.330738	0.00363929	0.116533	0.436621	1.07252	1.09967	0.794219	-0.00756048	-0.067236	-0.0922868	42.4025	0.169414	0.00237536	0.711749	0.740644	0.000767418	0.0397223	0.0178099	0.194297	0.200473	0.0594908	0.0851919	0.0845654	0.000173391
L-HA-L C563A 10x	0	0.14047	109.44	2.718	0.978348	80.5005	-1.67242	5.51803	32.7996	0.0755542	-0.0545161	0.0170562	-0.154779	6.94037	0.0199977	7.84985	8.20974	0.0917292	0.00204986	0.0283731	0.0901123	0.260867	0.257434	0.194317	-0.0124349	-0.0761162	-0.102542	48.1463	0.166841	0.000803079	0.143227	0.149969	0.000209295	0.0105609	0.00346332	0.0395392	0.0458205	0	0.0174054	0.0184658	5.41846e-05
Blank 2%	0	0	0	0	0	81.5618	0	0	31.8786	0.01387	0	0	0	0	0	0	0	0	0	0	0	0	0	0	0	0	0	0	0.136817	0	0	0	0	0.00301831	0	0	0	0.0204416	0	0	0
SRM1643-1X	16.3115	152.279	18540.8	7363.12	132.616	N/A	1908.9	29188	N/A	N/A	35.7142	18.2309	18.2966	92.3038	36.827	92.6751	91.8153	91.1062	25.0591	58.6424	21.2745	73.3808	72.9982	74.4028	56.9601	11.5951	11.5673	4.38915	N/A	12.3601	311.015	311.146	5.82851	N/A	54.9272	513.698	512.221	N/A	18.2867	18.2386	24.9089
SRM1643-2X	8.25267	73.4008	9195.97	3678.32	65.445	N/A	953.271	14357.4	N/A	N/A	17.7621	9.2295	9.12366	46.2957	18.0759	45.6795	47.395	48.2731	12.4158	30.3061	10.89	37.2065	37.8492	35.4986	28.1555	5.75662	5.7622	11.9255	N/A	6.45116	153.908	154.649	2.89577	N/A	27.2088	253.43	256.202	N/A	9.07708	9.12441	12.4573
SRM1643-5X	3.6522	27.7185	4396.5	1534.9	26.9804	N/A	397.932	5933.29	N/A	N/A	7.16434	3.78245	3.75194	18.9324	7.55054	18.5662	18.211	19.6446	5.0756	12.3719	4.53061	15.01	15.259	14.3313	11.2648	2.24763	2.37992	14.9994	N/A	2.66252	63.7182	61.9205	1.18692	N/A	11.1325	103.249	104.529	N/A	3.7796	3.87539	5.26383
SRM1643-10X	1.77031	15.1648	2134.59	844.544	15.0789	N/A	220.497	3279.37	N/A	N/A	3.94588	2.12733	2.06366	10.1959	4.24645	10.3413	11.0967	10.8674	2.82225	6.87554	2.45389	8.22303	8.3358	7.91381	6.14276	1.34389	1.31282	14.2452	N/A	1.44361	35.7464	34.3888	0.650929	N/A	6.10808	59.5034	57.8232	N/A	2.12041	2.16937	3.08065
SRM1643-50X	0.362421	3.02819	397.809	162.092	3.00933	N/A	44.3475	618.856	N/A	N/A	0.731631	0.423981	0.407582	2.11506	0.798722	1.89019	1.76714	2.07682	0.534544	1.31435	0.477578	1.55403	1.56492	1.48565	1.13355	0.261915	0.344261	14.311	N/A	0.274882	6.84423	6.5418	0.122956	N/A	1.15265	11.1339	11.2708	N/A	0.400884	0.421169	0.580875

## Sheet: Run_2_4-1-22
SampleList	SampleList	ExtCal.Average	ExtCal.Average	ExtCal.Average	ExtCal.Average	ExtCal.Average	ExtCal.Average	ExtCal.Average	ExtCal.Average	ExtCal.Average	ExtCal.Average	ExtCal.Average	ExtCal.Average	ExtCal.Average	ExtCal.Average	ExtCal.Average	ExtCal.Average	ExtCal.Average	ExtCal.Average	ExtCal.Average	ExtCal.Average	ExtCal.Average	ExtCal.Average	ExtCal.Average	ExtCal.Average	ExtCal.Average	ExtCal.Average	ExtCal.Average	ExtCal.Average	ExtCal.Average	ExtCal.Average	ExtCal.Average	ExtCal.Average	ExtCal.Average	ExtCal.Average	ExtCal.Average	ExtCal.Average	ExtCal.Average	ExtCal.Average	ExtCal.Average	ExtCal.Average	ExtCal.Average
SampleId	SampleLine	0	0	0	0	0	0	0	0	0	0	0	0	0	0	0	0	0	0	0	0	0	0	0	0	0	0	0	0	0	0	0	0	0	0	0	0	0	0	0	0	0
		7Li (KED)	11B (STD)	23Na (STD)	24Mg (STD)	27Al (STD)	29Si (STD)	39K (STD)	44Ca (STD)	45Sc (STD)	48Ti (STD)	51V (STD)	52Cr (STD)	53Cr (STD)	54Fe (KED)	55Mn (STD)	56Fe (KED)	57Fe (KED)	58Fe (KED)	59Co (STD)	60Ni (STD)	63Cu (STD)	64Zn (STD)	66Zn (STD)	68Zn (STD)	75As (STD)	77Se (STD)	78Se (STD)	80Se (STD)	83Kr (STD)	85Rb (STD)	86Sr (STD)	88Sr (STD)	111Cd (STD)	118Sn (STD)	121Sb (STD)	135Ba (STD)	137Ba (STD)	202Hg (STD)	206Pb (STD)	208Pb (STD)	238U (STD)
		Y (ppb)	Y (ppb)	Y (ppb)	Y (ppb)	Y (ppb)	Y (ppm)	Y (ppb)	Y (ppb)	Y (ppb)	Y (ppm)	Y (ppb)	Y (ppb)	Y (ppb)	Y (ppb)	Y (ppb)	Y (ppb)	Y (ppb)	Y (ppb)	Y (ppb)	Y (ppb)	Y (ppb)	Y (ppb)	Y (ppb)	Y (ppb)	Y (ppb)	Y (ppb)	Y (ppb)	Y (ppb)	Y (ppt)	Y (ppb)	Y (ppb)	Y (ppb)	Y (ppb)	Y (ppb)	Y (ppb)	Y (ppb)	Y (ppb)	Y (ppt)	Y (ppb)	Y (ppb)	Y (ppb)
1	2% Blank	0	0	0	0	0	0.0706713	0	0	0.0281132	2.40724e-05	0	0	0	0	0	0	0	0	0	0	0	0	0	0	0	0	0	0	28.4097	0	0	0	0	0.00152201	0	0	0	0.0296933	0	0	0
2	SRM1643-1X	16.1914	151.922	17881.1	7293.49	131.175	N/A	1897.25	29011.1	N/A	N/A	35.6065	18.2475	18.2213	91.5456	36.5669	91.657	91.2757	90.3391	24.8628	58.5085	20.9781	73.3874	72.6816	73.9389	56.6638	11.6042	11.4533	11.5746	N/A	12.4173	308.82	309.755	5.8006	N/A	54.6898	510.94	510.972	N/A	18.1485	18.1645	24.9499
3	SRM1643-2X	8.5772	74.0232	10528.5	3794.69	67.9973	N/A	973.536	14617.5	N/A	N/A	17.835	9.11828	9.2419	47.7868	18.5647	47.5045	47.854	49.4198	12.7224	30.3731	11.346	36.9327	38.2508	36.1075	28.5431	5.73707	5.87706	8.05171	N/A	6.28668	157.89	156.099	2.93999	N/A	27.5077	258.305	257.796	N/A	9.29523	9.25195	12.5328
4	SRM1643-5X	3.33939	27.67	4205.99	1563.54	27.4349	N/A	398.929	6039.87	N/A	N/A	7.35983	3.90184	3.7831	18.5415	7.50695	18.7662	19.7492	20.1724	5.17108	12.6235	4.69867	15.2871	15.4809	14.7203	11.5315	2.2577	2.51651	-3.49755	N/A	2.72442	63.9146	63.6074	1.19171	N/A	11.2944	103.903	104.639	N/A	3.84118	3.87197	4.95602
5	SRM1643-10X	1.98078	15.7283	2454.1	904.558	15.8945	N/A	234.856	3541.42	N/A	N/A	4.27057	2.29003	2.17141	11.1564	4.50316	11.0048	11.1049	11.7951	3.06771	7.40257	2.81139	8.98869	9.06763	8.73312	6.6338	1.33655	1.62781	1.56939	N/A	1.57498	37.5187	37.737	0.700604	N/A	6.67466	61.5709	62.3237	N/A	2.2958	2.29076	2.92482
6	SRM1643-50X	1.35853	12.5168	1984.99	725.173	12.9658	N/A	189.984	2797.26	N/A	N/A	3.36341	1.82572	1.70791	8.87794	3.61636	8.62623	8.64649	9.20639	2.42072	5.94719	2.22719	7.40714	7.53796	7.10453	5.26401	1.08797	1.26903	10.3227	N/A	1.27279	30.9555	29.9705	0.566678	N/A	5.31252	50.6835	49.9963	N/A	1.87781	1.84438	2.40671
7	Mock 1x	0	0.575183	14967.4	6.20555	5.64136	0.0832099	8.85408	47.2889	0.0311051	0.00147141	0.00564921	3.04713	2.98267	50.3036	0.132997	55.4311	54.1362	0.57678	0.00529185	0.238953	1.05472	1.9828	2.01166	1.42091	0.00388236	-0.0312837	0.0277135	54.0535	29.142	0.0103286	1.21829	1.25666	0.000522769	0.126377	0.250983	0.362401	0.369298	0.0593863	0.023961	0.023463	0.000284259
8	Mock 2x	0	0.308334	7305.04	2.68559	2.65753	0.0721644	1.5982	21.036	0.027596	0.000591213	-0.00110889	1.47834	1.43935	23.9905	0.0513479	27.1754	26.4395	0.288825	0.00221759	0.119542	0.503726	0.73275	0.717113	0.532322	0.000352935	-0.0196641	-0.262498	65.1081	25.3343	0.00352802	0.600623	0.610984	0.000427719	0.0586954	0.122653	0.177048	0.178438	0.0445398	0.0106928	0.0107158	0.000214116
9	Mock 10x	-0.0103703	0.119617	1503.65	3.58517	0.468491	0.0718702	0.454187	5.69482	0.0286918	0.000141823	-0.00955437	0.302103	0.269581	5.11427	0.0126179	5.68352	5.44084	0.0731092	0.00029747	0.0343583	0.123187	0.407884	0.410105	0.304876	-0.00091771	-0.0697175	-0.0290773	61.2919	27.4578	0.00194366	0.125728	0.131655	0.00033267	0.0240559	0.0309168	0.0468506	0.0480041	0.0445398	0.00406944	0.0049617	0.000147666
10	ORF1 No Tag 1x	0.0207407	0.589005	5638.57	6.65858	3.65151	0.0710409	3.24391	149.754	0.0298124	0.00123552	0.00491984	1.34841	1.31507	50.5055	0.159402	58.5859	55.9387	0.714262	0.00894338	0.314257	1.18576	1.52904	1.55321	1.12403	-0.00042356	-0.0661429	-0.27429	86.7595	29.3616	0.00671169	1.22952	1.28219	0.00266139	0.109697	0.0280335	0.348802	0.364395	0.0890796	0.0945721	0.0981054	0.000335944
11	ORF1 No Tag 2x	-0.0103703	0.31818	2773.12	2.72281	1.86282	0.0696055	0.529284	20.1061	0.0269928	0.000364335	-0.00743112	0.712289	0.672334	25.3227	0.0737006	28.2614	27.5845	0.442593	0.0225975	0.21593	0.597457	0.844584	0.850229	0.609325	-0.00345882	-0.0679305	-0.207085	71.3164	28.6295	0.00437158	0.5871	0.601689	0.000142573	0.0759924	0.0183866	0.178107	0.187079	0.118773	0.0239211	0.0218791	0.00032856
12	ORF1 No Tag 10x	-0.0103703	0.101303	579.782	0.525326	0.286461	0.0759761	-1.44226	3.07259	0.0274852	8.51569e-05	-0.0197977	0.120866	0.0655979	5.23068	0.0137828	5.87203	5.86577	0.0751453	0.000360572	0.0351015	0.123148	0.127667	0.12152	0.0844557	-0.00494114	-0.0893817	-0.133582	71.5715	27.3846	0.000667429	0.118775	0.12353	9.50493e-05	0.0339245	0.005764	0.0448569	0.0484362	0.0890798	0.00337124	0.00349434	0.000302726
13	L-HA-L WT 1x	0.342222	0.773178	676.713	9.21451	18.6531	0.0717163	5.52327	52.7915	0.208078	0.0195625	-0.000360995	0.22926	0.183958	43.7078	0.424611	50.4256	48.5085	0.538779	0.00879012	0.211947	0.428908	2.20339	2.21077	1.58922	-0.0014118	-0.0464791	-0.221373	73.5579	30.0939	0.0108349	3.37302	3.4851	0.00489507	0.0545347	0.0491546	0.682441	0.692733	0.207852	0.0419817	0.0422349	0.0678494
14	L-HA-L WT 2x	0.217777	0.415799	341.95	4.45798	9.30074	0.070372	1.49536	25.7318	0.119562	0.00987428	-0.0186352	0.0967599	0.0445369	22.4113	0.213133	25.6869	25.0206	0.276045	0.00349774	0.112106	0.218685	1.10958	1.10527	0.807281	-0.00832931	-0.0902759	-0.266628	73.463	23.7235	0.0055893	1.69004	1.75759	0.00204356	0.0302543	0.0252771	0.348302	0.350264	0.103926	0.0199504	0.01931	0.0329947
15	L-HA-L WT 10x	0.0414813	0.115475	66.9929	1.15369	1.9991	0.0698958	-1.72219	5.08759	0.0445779	0.00197251	-0.0338655	-0.000174129	-0.0634945	4.5103	0.0397442	5.08264	5.15424	0.0545065	0.000423674	0.0203693	0.0471218	0.192378	0.183796	0.130667	-0.00959985	-0.0867006	-0.218621	64.0689	27.5311	0.00094614	0.324744	0.341904	0.000285146	0.0133727	0.00228019	0.0652944	0.0693326	0.0148466	5.98534e-05	-0.000694962	0.00652098
16	L-HA-L C483A 1x	0.0414814	0.433853	744.001	15.1369	4.68843	0.0695961	2.84206	51.4223	0.0279284	0.000647709	-0.0200933	0.327368	0.236465	49.8369	0.170744	58.1653	55.7833	0.662713	0.00704995	0.279359	0.667667	1.63225	1.67899	1.20521	-0.0101646	-0.0759744	-0.337375	77.3813	26.3594	0.00746732	1.33757	1.38532	0.00128316	0.0426522	0.16289	0.3634	0.383574	0.0445398	0.0522415	0.053176	0.00032856
17	L-HA-L C483A 2x	0.0518516	0.240195	370.183	8.16104	2.43622	0.0702244	1.44586	28.327	0.0267588	0.000351504	-0.0306198	0.15021	0.0696083	24.9832	0.0858815	29.2287	28.8948	0.351992	0.00400259	0.144082	0.337466	0.854957	0.880839	0.638327	-0.0099528	-0.0992141	-0.200235	67.1596	29.7278	0.00405616	0.681646	0.694342	0.00095049	0.0348217	0.0876448	0.198432	0.19662	0.13362	0.0275329	0.0260132	0.000203041
18	L-HA-L C483A 10x	0	0.0817947	73.4589	1.58367	0.363018	0.0699876	-1.38103	4.63786	0.026845	8.4062e-05	-0.0404046	0.00961043	-0.079451	4.99101	0.0163823	5.78856	5.90532	0.0771818	9.91547e-05	0.028238	0.0705979	0.172169	0.1718	0.132369	-0.0116469	-0.0884883	-0.223832	61.8217	27.6043	0.000784778	0.133942	0.137864	-9.50486e-05	0.0219899	0.0245484	0.0490936	0.0477523	0.0296932	0.00560548	0.00589814	0.000166125
19	L-HA-L C563A 1x	0.0622219	0.432011	549.679	5.40419	3.59226	0.0702012	3.17586	33.3414	0.0270419	0.000561561	-0.0361259	0.0838864	-0.0122824	38.3067	0.1479	44.6759	43.3724	0.507825	0.00546314	0.202888	0.37809	1.12891	1.15564	0.854076	-0.0115056	-0.0938506	-0.316802	70.482	25.3343	0.00623487	1.14777	1.1688	0.00109307	0.104066	0.25464	0.343124	0.344534	0.148467	0.0318233	0.0313841	0.000184583
20	L-HA-L C563A 2x	0.031111	0.269011	733.471	4.03432	2.02732	0.0696492	2.01307	19.9674	0.0254784	0.000329936	-0.0403489	0.0302362	-0.0649984	21.7049	0.0806018	24.8498	24.0572	0.274563	0.00277652	0.11215	0.231995	1.24972	1.28663	0.928717	-0.0122821	-0.109939	-0.179945	75.3487	28.0437	0.00524452	0.620094	0.640856	0.000285146	0.0721574	0.178023	0.187584	0.192262	0.0890795	0.0199304	0.020073	0.000151358
21	L-HA-L C563A 10x	-0.0207406	0.0946777	64.5073	1.41197	0.518722	0.0701733	6.6951	29.7488	0.0261801	0.000223488	-0.0473382	-0.0129213	-0.108185	4.53221	0.0996792	5.3909	5.52647	0.109577	0.00129809	0.0542947	0.111362	2.33539	2.40505	1.69849	-0.0121409	-0.0983198	-0.216423	68.2045	28.483	0.00856779	0.150605	0.150261	0.00237623	0.0449089	0.0463971	0.0722111	0.0764554	0.0445398	0.0494666	0.0479466	0.000413493
22	L-HA-L D248A 1x	0.0103703	0.383012	2203.63	7.6959	7.21577	0.0710238	4.71268	52.7865	0.0269312	0.00108986	-0.0080505	0.133628	0.0341751	53.3045	0.135292	62.7792	59.4254	0.586141	0.00897947	0.227485	0.490094	1.70866	1.73085	1.25526	-0.011788	-0.118878	-0.375227	82.4415	27.1649	0.00999111	1.26625	1.31267	0.000950489	0.0685402	0.0746904	0.376315	0.372255	0.148466	0.0282912	0.0295391	0.000232575
23	L-HA-L D248A 2x	-0.0103703	0.203465	1099.26	3.68128	3.71555	0.06868	0.360008	25.4622	0.0270051	0.000737232	-0.0270498	0.0442493	-0.0544733	26.9799	0.0683048	31.3837	30.1986	0.305403	0.00424604	0.113593	0.24581	0.705914	0.717737	0.520576	-0.0150349	-0.117089	-0.295687	74.1964	28.7027	0.00465033	0.632305	0.660558	0.00033267	0.0385196	0.0387752	0.197559	0.194675	0.0593863	0.0151418	0.0135642	0.0001329
24	L-HA-L D248A 10x	-0.0207406	0.0828988	225.718	0.613016	0.793403	0.0689245	-1.46578	4.28492	0.0267341	0.000108876	-0.0463701	-0.0148522	-0.128481	5.66899	0.0189492	6.51412	6.09309	0.0645944	0.000594956	0.0244784	0.0680535	0.186983	0.181994	0.131613	-0.0138349	-0.0974257	-0.224934	77.6428	25.3343	0.00099748	0.128622	0.137214	-9.50486e-05	0.0182384	0.00527309	0.0575054	0.0573192	0.0296932	0.00347098	0.00297308	2.58415e-05
25	L-HA-L H249A 1x	0.0518516	0.271313	417.794	7.2316	5.04111	0.070388	5.25461	42.8307	0.026451	0.000733342	-0.0437517	0.116433	0.00551344	52.9711	0.164023	61.73	59.0316	0.621642	0.00493122	0.235844	0.794102	1.31424	1.38164	0.981989	-0.0144702	-0.105471	-0.208194	65.0775	25.9201	0.00999114	1.40455	1.45249	0.000760391	0.0670447	0.0566035	0.379497	0.389706	0.13362	0.047251	0.0472701	0.000180891
26	L-HA-L H249A 2x	0.0103703	0.168579	208.337	3.39418	2.41581	0.0702967	1.08922	19.9117	0.0253799	0.000367985	-0.0522611	0.0421739	-0.0753578	26.1381	0.0794011	30.0518	29.7694	0.306699	0.00233479	0.115343	0.394973	0.634236	0.646599	0.475046	-0.0152466	-0.101001	-0.21094	67.5044	29.2152	0.00477505	0.687825	0.713829	0.000237622	0.0365345	0.0289682	0.19282	0.195287	0.118773	0.0222449	0.0222074	0.000236267
27	L-HA-L H249A 10x	0	0.0812426	42.211	0.556064	0.446863	0.0700344	-0.986307	3.48451	0.0264756	9.38192e-05	-0.0555057	-0.0109415	-0.142847	5.44298	0.0259074	6.29461	6.07002	0.0630211	0.000108172	0.0267079	0.101738	0.236432	0.243042	0.174617	-0.0146114	-0.121559	-0.185433	64.0595	27.3846	0.00121752	0.136742	0.145835	9.50493e-05	0.0148134	0.00888377	0.0553869	0.0566718	0.0296932	0.0460933	0.0453274	0.000169816
28	Water 1x	0.062222	0.302711	2751.39	6.63766	4.7758	0.0678798	-0.913508	38.5161	0.0330014	0.00288975	-0.0385419	1.3528	1.20424	47.4209	0.109448	53.8066	51.917	0.565285	0.00526479	0.224158	0.585049	0.739295	0.751073	0.538009	-0.0133409	-0.110833	-0.356836	88.5245	26.5791	0.00597811	1.28339	1.32751	0.000665343	0.0823571	0.0297761	0.360906	0.364971	0.0445399	0.0420815	0.0388044	0.000575907
29	Water 2x	0.0103704	0.174194	1387.9	3.784	2.39442	0.0676408	-0.322766	11.9343	0.0290736	0.00144729	-0.0475503	0.67475	0.537635	23.776	0.0534372	26.8963	26.4229	0.289474	0.00213646	0.115605	0.307597	0.418987	0.425287	0.305444	-0.0151055	-0.101002	-0.246325	71.7906	28.1169	0.00343999	0.643072	0.669188	0.000285146	0.049749	0.0174996	0.227176	0.23216	0.0296932	0.0215266	0.0205269	0.000358093
30	Water 10x	0.0207406	0.0753534	289.155	0.492011	0.431219	0.0691724	-2.5337	1.34208	0.027202	0.000321854	-0.0539848	0.119827	-0.00919053	5.20741	0.00985439	5.83181	5.84931	0.0666306	0.000234371	0.0242161	0.0684583	0.0801761	0.0751662	0.0541997	-0.015529	-0.109939	-0.186244	58.7034	28.8491	0.00081412	0.131141	0.138474	9.50486e-05	0.0179394	0.00650829	0.045293	0.0473925	0.0445399	0.00313185	0.0032144	0.000217808
31	Blank 2%	0	0	0	0	0	0.0690894	0	0	0.0234609	4.823e-05	0	0	0	0	0	0	0	0	0	0	0	0	0	0	0	0	0	0	23.9222	0	0	0	0	0.00214888	0	0	0	0.106254	0	0	0
32	SRM1643-1X	16.1863	150.545	17932.4	7284.81	131.302	N/A	1893.03	28877.4	N/A	N/A	35.4751	18.124	18.1687	91.7069	36.3934	91.8445	91.7272	90.2725	24.8491	58.331	20.8754	73.3004	72.2247	73.6049	56.2103	11.5845	11.3617	6.11739	N/A	12.4007	308.378	308.511	5.79382	N/A	54.7008	508.304	511.68	N/A	18.0093	18.1135	24.8721
33	SRM1643-2X	8.61649	77.2542	10546.5	3865.71	68.7859	N/A	993.451	15093.3	N/A	N/A	18.3406	9.45357	9.44521	47.4516	19.0746	47.1838	47.3876	49.8129	12.8791	31.0178	11.6737	37.6723	39.6758	37.2548	29.7426	5.81962	6.01775	9.03992	N/A	6.38974	160.807	160.888	2.99115	N/A	27.8327	266.645	260.711	N/A	9.66236	9.42396	12.7861
34	SRM1643-5X	3.27027	26.8896	4028.88	1474.99	25.7987	N/A	382.229	5723.44	N/A	N/A	6.94047	3.76387	3.61335	19.0815	7.29189	19.0324	19.131	20.1103	5.00005	12.2282	4.54147	14.436	14.7336	14.1115	11.0921	2.2191	2.59719	13.1716	N/A	2.6238	60.6379	60.1325	1.13557	N/A	10.8305	100.054	98.3267	N/A	3.76227	3.82745	4.82059
35	SRM1643-10X	1.99147	14.8899	2190.16	809.446	13.8915	N/A	209.048	3119.72	N/A	N/A	3.87887	2.10259	2.0081	10.1139	4.09716	10.1742	10.1054	10.5575	2.75216	6.6997	2.4957	7.84675	7.98468	7.54341	6.03191	1.19096	1.58079	14.8628	N/A	1.41738	33.7146	33.0569	0.622547	N/A	5.84751	53.6189	53.0134	N/A	1.99753	2.0166	2.69511
36	SRM1643-50X	0.241068	3.07681	449.227	167.318	2.98283	N/A	47.5984	647.827	N/A	N/A	0.798276	0.477035	0.42757	1.97877	0.842951	1.98779	2.11401	2.16298	0.558654	1.40829	0.52516	1.55085	1.58284	1.52497	1.22981	0.266	0.720495	15.2295	N/A	0.297358	7.20695	6.84432	0.12835	N/A	1.19743	11.8236	11.6699	N/A	0.429098	0.429025	0.558294

## Sheet: Run_3_4-15-22
SampleList	SampleList	ExtCal.Average	ExtCal.Average	ExtCal.Average	ExtCal.Average	ExtCal.Average	ExtCal.Average	ExtCal.Average	ExtCal.Average	ExtCal.Average	ExtCal.Average	ExtCal.Average	ExtCal.Average	ExtCal.Average	ExtCal.Average	ExtCal.Average	ExtCal.Average	ExtCal.Average	ExtCal.Average	ExtCal.Average	ExtCal.Average	ExtCal.Average	ExtCal.Average	ExtCal.Average	ExtCal.Average	ExtCal.Average	ExtCal.Average	ExtCal.Average	ExtCal.Average	ExtCal.Average	ExtCal.Average	ExtCal.Average	ExtCal.Average	ExtCal.Average	ExtCal.Average	ExtCal.Average	ExtCal.Average	ExtCal.Average	ExtCal.Average	ExtCal.Average	ExtCal.Average	ExtCal.Average
SampleId	SampleLine	0	0	0	0	0	0	0	0	0	0	0	0	0	0	0	0	0	0	0	0	0	0	0	0	0	0	0	0	0	0	0	0	0	0	0	0	0	0	0	0	0
		7Li (KED)	11B (STD)	23Na (STD)	24Mg (STD)	27Al (STD)	29Si (STD)	39K (STD)	44Ca (STD)	45Sc (STD)	48Ti (STD)	51V (STD)	52Cr (STD)	53Cr (STD)	54Fe (KED)	55Mn (STD)	56Fe (KED)	57Fe (KED)	58Fe (KED)	59Co (STD)	60Ni (STD)	63Cu (STD)	64Zn (STD)	66Zn (STD)	68Zn (STD)	75As (STD)	77Se (STD)	78Se (STD)	80Se (STD)	83Kr (STD)	85Rb (STD)	86Sr (STD)	88Sr (STD)	111Cd (STD)	118Sn (STD)	121Sb (STD)	135Ba (STD)	137Ba (STD)	202Hg (STD)	206Pb (STD)	208Pb (STD)	238U (STD)
		Y (ppb)	Y (ppb)	Y (ppb)	Y (ppb)	Y (ppb)	Y (ppb)	Y (ppb)	Y (ppb)	Y (ppt)	Y (ppb)	Y (ppb)	Y (ppb)	Y (ppb)	Y (ppb)	Y (ppb)	Y (ppb)	Y (ppb)	Y (ppb)	Y (ppb)	Y (ppb)	Y (ppb)	Y (ppb)	Y (ppb)	Y (ppb)	Y (ppb)	Y (ppb)	Y (ppb)	Y (ppb)	Y (ppb)	Y (ppb)	Y (ppb)	Y (ppb)	Y (ppb)	Y (ppb)	Y (ppb)	Y (ppb)	Y (ppb)	Y (ppt)	Y (ppb)	Y (ppb)	Y (ppb)
1	2% Blank	0	0	0	0	0	79.7627	0	0	32.78	0.0136798	0	0	0	0	0	0	0	0	0	0	0	0	0	0	0	0	0	0	0.167269	0	0	0	0	0.00283147	0	0	0	0.0594908	0	0	0
2	SRM1643-1X	16.2337	152.989	18311.9	7322.71	130.715	N/A	1886.78	28878.9	N/A	N/A	35.6191	18.158	18.2021	91.6604	36.5213	92.7952	91.4274	91.3143	24.937	58.6428	21.1026	73.5611	73.241	74.5425	56.7143	11.636	11.5533	7.73888	N/A	12.4423	309.39	310.396	5.79908	N/A	54.7549	512.123	510.03	N/A	18.3641	18.1859	25.0409
3	SRM1643-2X	8.48011	73.3422	9725.25	3795.42	69.6643	N/A	1005.39	15080.9	N/A	N/A	18.1895	9.46491	9.41788	47.8095	18.8684	45.8235	47.8576	48.143	12.7835	30.6371	11.2903	37.2245	37.7517	35.6264	28.881	5.79601	5.88196	10.0266	N/A	6.39132	159.109	157.137	2.9788	N/A	27.8287	259.595	262.872	N/A	9.04766	9.38627	12.4429
4	SRM1643-5X	3.4602	26.4326	4471.48	1542.15	27.6544	N/A	402.135	6039	N/A	N/A	7.06469	3.8119	3.77209	19.1895	7.61471	18.5008	19.9155	19.7861	5.11611	12.3528	4.63458	15.0087	15.2539	14.2595	11.3712	2.15967	2.33023	6.90153	N/A	2.5727	63.1954	63.3839	1.19719	N/A	11.1532	103.07	105.416	N/A	3.73678	3.76227	5.06159
5	SRM1643-10X	1.78205	11.0003	1627.02	649.521	11.6571	N/A	173.155	2542	N/A	N/A	2.96978	1.62391	1.52228	8.58328	3.21839	8.54245	9.21955	9.15463	2.12831	5.26738	1.96416	6.347	6.41317	6.03285	4.76044	0.928714	0.956269	7.15345	N/A	1.1022	27.1081	26.5271	0.509992	N/A	4.69799	44.8276	44.6944	N/A	1.58468	1.61817	2.24713
6	SRM1643-50X	0.430657	2.66591	398.435	157.529	2.94815	N/A	41.9106	612.395	N/A	N/A	0.676949	0.405557	0.282575	1.93282	0.774509	1.93364	1.93682	2.07646	0.513674	1.25037	0.473372	1.48597	1.52643	1.42772	1.13083	0.185221	0.326571	10.7356	N/A	0.265892	6.48245	6.51433	0.121071	N/A	1.11438	10.9147	10.8223	N/A	0.374329	0.397908	0.528795
7	Mock	-0.0148502	1.67597	1851.83	27.0772	11.0817	89.1647	7.00444	65.0888	36.1604	0.672235	-0.0203112	0.214657	0.096689	79.3101	0.19088	90.6555	88.8174	0.723649	0.00640234	0.234073	0.947886	3.39891	3.54729	2.51668	-0.00149222	-0.0253722	0.0721709	19.7101	0.182606	0.00702463	1.68192	1.7516	0.00174413	0.0936986	0.0616138	0.499117	0.489163	0.0396605	0.0293301	0.0301164	0.000433482
8	Mock	0	0.876036	929.487	13.9843	5.67951	88.392	3.21474	29.2812	34.7341	0.327542	-0.0272346	0.111867	-0.0108982	38.5686	0.0952607	42.8697	45.0379	0.350513	0.00341647	0.118671	0.476346	1.05758	1.09035	0.794219	-0.00557089	-0.0253718	0.111605	17.5939	0.172417	0.00279388	0.848974	0.885067	0.000906946	0.0472624	0.0302342	0.246187	0.257962	0.0198303	0.0147237	0.0156063	0.000254669
9	Mock	-0.0148502	0.204803	154.168	2.36692	0.97333	88.2145	1.32662	7.04855	36.2776	0.0783377	-0.0347715	0.0338858	-0.094438	6.11903	0.0191681	6.80061	6.97447	0.105906	0.000712983	0.0458407	0.0809448	0.384272	0.385963	0.282994	-0.00795842	-0.0456699	0.02563	15.9684	0.170594	0.000780457	0.137584	0.147849	6.9765e-05	0.0139666	0.00641366	0.05048	0.0511704	0.0396605	0.00337546	0.00394792	8.12769e-05
10	ORF1 No Tag	-0.0148502	1.57712	277.96	28.4226	11.0986	88.4744	4.61912	83.5587	37.7238	0.672872	-0.029842	0.141678	0.0107568	58.7057	0.175729	65.2081	66.7018	0.624712	0.00689255	0.244179	0.792282	2.40079	2.4605	1.77239	-0.00507352	-0.0570872	-0.0205103	32.737	0.172203	0.00705856	1.49634	1.51418	0.00230225	0.0716077	0.0282667	0.410963	0.410308	0.0594908	0.0787701	0.0763506	0.000444319
11	ORF1 No Tag	-0.0148502	0.798089	139.19	13.4684	4.59048	86.3167	2.69399	36.843	36.7466	0.325335	-0.0384123	0.0762101	-0.0616105	28.4677	0.0877078	31.8242	32.7882	0.305101	0.00265888	0.101641	0.376244	1.1179	1.15144	0.809156	-0.00547145	-0.0494755	0.000390523	28.4495	0.173918	0.00397031	0.720811	0.73008	0.000627888	0.0351296	0.0210388	0.200502	0.204967	0.059491	0.0383587	0.039718	0.000265507
12	ORF1 No Tag	0	0.189877	27.9625	2.76145	0.990213	87.2246	0.433276	7.79939	35.6328	0.0794259	-0.0425774	0.019994	-0.113854	6.12542	0.0180691	6.68251	6.96422	0.0584703	0.000415905	0.0201925	0.0821611	0.220173	0.239991	0.161124	-0.00835634	-0.0685045	0.0165584	32.7274	0.170808	0.000633412	0.131217	0.154826	0.00013953	0.0107905	0.00224473	0.045311	0.0488487	0.0396605	0.00761295	0.00808366	7.044e-05
13	L-HA-L WT	0	1.81035	2098.01	27.8959	9.84617	86.538	9.49942	97.9612	33.4834	0.780416	-0.0240578	0.160737	0.0293393	66.3532	0.196453	73.084	74.3692	0.737296	0.0066549	0.274125	1.15929	4.95017	5.11706	3.67799	-0.00457612	-0.0494756	-0.0642898	42.4804	0.171023	0.00737534	1.54616	1.5889	0.00202319	0.0742493	0.0404146	0.432007	0.445	0.0198303	0.0894812	0.086444	0.000428063
14	L-HA-L WT	-0.0148502	0.918688	1017.76	13.4478	4.7973	84.3221	1.88663	38.3252	34.0306	0.341776	-0.0332132	0.0798098	-0.0590954	33.272	0.0980447	36.5338	38.2652	0.326101	0.00334219	0.114394	0.572617	1.13314	1.14089	0.833344	-0.00925167	-0.0646988	-0.0579732	37.4072	0.163838	0.00315585	0.747497	0.78427	0.000558121	0.0385359	0.0177885	0.222912	0.226588	0.0198303	0.039508	0.0414064	0.000162554
15	L-HA-L WT	0	0.224618	208.797	2.84893	1.02911	84.5789	-0.317138	10.7167	34.5777	0.100508	-0.0456636	0.0408517	-0.0982094	7.08294	0.0225903	7.44568	7.21026	0.368515	0.00415921	0.209661	0.128378	0.669654	0.688373	0.494531	-0.00905262	-0.0710417	-0.00157899	38.4269	0.132308	0.000689968	0.1187	0.16012	0.000348825	0.0259063	0.00489571	0.0509107	0.0516751	0.158642	0.0117548	0.0120088	5.96034e-05
16	L-HA-L C483A	-0.0148502	1.83191	704.187	26.8127	9.57728	84.3561	2.23803	90.0195	36.1214	0.68736	-0.0405098	0.142955	-0.014391	57.6203	0.215124	63.8423	65.2677	0.613659	0.00695199	0.237318	0.862165	2.66676	2.76112	1.97202	-0.00815739	-0.050744	-0.0374692	43.4126	0.161263	0.00505627	1.62311	1.64908	0.00174413	0.0768523	0.0382973	0.382847	0.398883	0.0396605	0.0755354	0.0705189	0.000493086
17	L-HA-L C483A	-0.0148502	0.895238	343.871	13.5786	4.6704	90.9353	0.313399	46.2098	34.7926	0.356546	-0.0458282	0.0700846	-0.0775355	27.5973	0.104675	31.262	32.1979	0.303737	0.00317879	0.112552	0.421077	1.33891	1.36905	0.991671	-0.00905269	-0.0900706	-0.0465401	42.039	0.179174	0.00237535	0.779264	0.800064	0.000976714	0.0400286	0.0189432	0.191797	0.201987	0.0594908	0.0352451	0.0357669	0.000254669
18	L-HA-L C483A	0.0297004	0.21175	68.774	2.67962	0.926542	83.2443	-1.25796	9.08141	34.2455	0.0838038	-0.0502622	0.00943113	-0.150868	5.59138	0.021688	6.40672	6.42605	0.0576527	0.000698132	0.0213717	0.0931367	0.273906	0.293726	0.212068	-0.0112412	-0.0799219	-0.0824306	42.8475	0.1544	0.000463746	0.142287	0.164599	0.000279061	0.00948949	0.00463918	0.0420374	0.0422878	0.0198303	0.00739745	0.00801336	3.79296e-05
19	L-HA-L C563A	-0.0148502	1.24612	1100.11	27.4686	9.88705	83.4008	2.10457	55.0427	33.4248	0.855544	-0.0477157	0.203941	0.0347893	68.0511	0.192119	76.3322	77.2602	0.673292	0.00723427	0.244399	0.901188	2.16863	2.19279	1.58472	-0.00815737	-0.067236	-0.116343	46.9971	0.173704	0.005373	1.46318	1.51579	0.00118601	0.077886	0.0390245	0.397334	0.390488	0.0991514	0.171904	0.169484	0.000568946
20	L-HA-L C563A	0	0.630639	535.875	13.6895	4.7308	90.9105	0.212837	26.9272	32.7996	0.322798	-0.0521796	0.0936703	-0.0493173	33.5112	0.0948342	37.2738	37.4747	0.330738	0.00363929	0.116533	0.436621	1.07252	1.09967	0.794219	-0.00756048	-0.067236	-0.0922868	42.4025	0.169414	0.00237536	0.711749	0.740644	0.000767418	0.0397223	0.0178099	0.194297	0.200473	0.0594908	0.0851919	0.0845654	0.000173391
21	L-HA-L C563A	0	0.14047	109.44	2.718	0.978348	80.5005	-1.67242	5.51803	32.7996	0.0755542	-0.0545161	0.0170562	-0.154779	6.94037	0.0199977	7.84985	8.20974	0.0917292	0.00204986	0.0283731	0.0901123	0.260867	0.257434	0.194317	-0.0124349	-0.0761162	-0.102542	48.1463	0.166841	0.000803079	0.143227	0.149969	0.000209295	0.0105609	0.00346332	0.0395392	0.0458205	0	0.0174054	0.0184658	5.41846e-05
22	Blank 2%	0	0	0	0	0	81.5618	0	0	31.8786	0.01387	0	0	0	0	0	0	0	0	0	0	0	0	0	0	0	0	0	0	0.136817	0	0	0	0	0.00301831	0	0	0	0.0204416	0	0	0
23	SRM1643-1X	16.3115	152.279	18540.8	7363.12	132.616	N/A	1908.9	29188	N/A	N/A	35.7142	18.2309	18.2966	92.3038	36.827	92.6751	91.8153	91.1062	25.0591	58.6424	21.2745	73.3808	72.9982	74.4028	56.9601	11.5951	11.5673	4.38915	N/A	12.3601	311.015	311.146	5.82851	N/A	54.9272	513.698	512.221	N/A	18.2867	18.2386	24.9089
24	SRM1643-2X	8.25267	73.4008	9195.97	3678.32	65.445	N/A	953.271	14357.4	N/A	N/A	17.7621	9.2295	9.12366	46.2957	18.0759	45.6795	47.395	48.2731	12.4158	30.3061	10.89	37.2065	37.8492	35.4986	28.1555	5.75662	5.7622	11.9255	N/A	6.45116	153.908	154.649	2.89577	N/A	27.2088	253.43	256.202	N/A	9.07708	9.12441	12.4573
25	SRM1643-5X	3.6522	27.7185	4396.5	1534.9	26.9804	N/A	397.932	5933.29	N/A	N/A	7.16434	3.78245	3.75194	18.9324	7.55054	18.5662	18.211	19.6446	5.0756	12.3719	4.53061	15.01	15.259	14.3313	11.2648	2.24763	2.37992	14.9994	N/A	2.66252	63.7182	61.9205	1.18692	N/A	11.1325	103.249	104.529	N/A	3.7796	3.87539	5.26383
26	SRM1643-10X	1.77031	15.1648	2134.59	844.544	15.0789	N/A	220.497	3279.37	N/A	N/A	3.94588	2.12733	2.06366	10.1959	4.24645	10.3413	11.0967	10.8674	2.82225	6.87554	2.45389	8.22303	8.3358	7.91381	6.14276	1.34389	1.31282	14.2452	N/A	1.44361	35.7464	34.3888	0.650929	N/A	6.10808	59.5034	57.8232	N/A	2.12041	2.16937	3.08065
27	SRM1643-50X	0.362421	3.02819	397.809	162.092	3.00933	N/A	44.3475	618.856	N/A	N/A	0.731631	0.423981	0.407582	2.11506	0.798722	1.89019	1.76714	2.07682	0.534544	1.31435	0.477578	1.55403	1.56492	1.48565	1.13355	0.261915	0.344261	14.311	N/A	0.274882	6.84423	6.5418	0.122956	N/A	1.15265	11.1339	11.2708	N/A	0.400884	0.421169	0.580875

## Sheet: Run_4_12-29-22
SampleList	SampleList	Raw.Average	Raw.Average	Raw.Average	Raw.Average	Raw.Average	Raw.Average	Raw.Average	Raw.Average	Raw.Average	Raw.Average	Raw.Average	Raw.Average	Raw.Average	Raw.Average	Raw.Average	Raw.Average	Raw.Average	Raw.Average	Raw.Average	Raw.Average	Raw.Average	Raw.Average	Raw.Average	Raw.Average	Raw.Average	Raw.Average	Raw.Average	Raw.Average	Raw.Average	Raw.Average	Raw.Average	Raw.Average	Raw.Average	Raw.Average	Raw.Average	Raw.Average	Raw.Average	Raw.Average	Raw.Average	Raw.Average	Raw.Average	Raw.STD	Raw.STD	Raw.STD	Raw.STD	Raw.STD	Raw.STD	Raw.STD
SampleId	SampleLine	0	0	0	0	0	0	0	0	0	0	0	0	0	0	0	0	0	0	0	0	0	0	0	0	0	0	0	0	0	0	0	0	0	0	0	0	0	0	0	0	0	0	0	0	0	0	0	0
		7Li (KED)	11B (STD)	23Na (STD)	24Mg (STD)	27Al (STD)	29Si (STD)	39K (STD)	44Ca (STD)	45Sc (STD)	48Ti (STD)	51V (STD)	52Cr (STD)	53Cr (STD)	54Fe (KED)	55Mn (STD)	56Fe (KED)	57Fe (KED)	58Fe (KED)	59Co (STD)	60Ni (STD)	63Cu (STD)	64Zn (STD)	66Zn (STD)	68Zn (STD)	75As (STD)	77Se (STD)	78Se (STD)	80Se (STD)	83Kr (STD)	85Rb (STD)	86Sr (STD)	88Sr (STD)	111Cd (STD)	118Sn (STD)	121Sb (STD)	135Ba (STD)	137Ba (STD)	202Hg (STD)	206Pb (STD)	208Pb (STD)	238U (STD)	7Li (KED)	11B (STD)	23Na (STD)	24Mg (STD)	27Al (STD)	29Si (STD)	39K (STD)
		Y (cps)	Y (cps)	Y (cps)	Y (cps)	Y (cps)	Y (cps)	Y (cps)	Y (cps)	Y (cps)	Y (cps)	Y (cps)	Y (cps)	Y (cps)	Y (cps)	Y (cps)	Y (cps)	Y (cps)	Y (cps)	Y (cps)	Y (cps)	Y (cps)	Y (cps)	Y (cps)	Y (cps)	Y (cps)	Y (cps)	Y (cps)	Y (cps)	Y (cps)	Y (cps)	Y (cps)	Y (cps)	Y (cps)	Y (cps)	Y (cps)	Y (cps)	Y (cps)	Y (cps)	Y (cps)	Y (cps)	Y (cps)	Y (cps)	Y (cps)	Y (cps)	Y (cps)	Y (cps)	Y (cps)	Y (cps)
1	2% Blank	0	433.342	167649	50073.7	3423.82	449140	2.96814e+06	23786.1	4754.25	1926.83	15937	33899.4	5214.45	50.0003	3457.17	236.67	3.33335	90.0007	186.669	406.675	243.337	1230.07	726.691	1773.47	1013.38	530.013	20824.1	1.76565e+07	273.337	56.6671	613.351	1943.49	3.33335	150.002	340.006	66.6671	70.0004	6.66669	30.0001	40.0003	13.3334	0	63.5109	1870.07	1165.83	240.978	1270.41	32587.8
2	SRM1643-1X	3510.51	3.67107e+06	2.48034e+09	6.36711e+08	1.56182e+07	546090	2.5257e+08	1.26253e+08	7155.41	1.35597e+07	5.20961e+06	2.66527e+06	311160	70468.5	7.72809e+06	1.14358e+06	30467.3	1.17873e+06	3.55267e+06	1.79864e+06	1.49633e+06	2.86019e+06	1.6621e+06	1.50438e+06	1.06075e+06	18687.3	77889	1.73888e+07	256.67	2.39186e+06	8.77151e+06	7.46727e+07	157330	7312.18	4.19045e+06	1.06722e+07	1.80897e+07	66.6672	1.57924e+06	3.30988e+06	6.59692e+06	87.2007	96715.9	4.53957e+06	1.59033e+06	182238	2789.28	2.28947e+06
3	SRM1643-2X	1753.46	1.79563e+06	1.23523e+09	3.18567e+08	7.77039e+06	526403	1.27534e+08	6.2493e+07	6498.39	6.73849e+06	2.7846e+06	1.33642e+06	156724	36129.1	3.87242e+06	594896	15356.2	620130	1.89675e+06	921749	760523	1.41858e+06	832467	751517	521111	9233.44	48022.2	1.72256e+07	236.67	1.22606e+06	4.28149e+06	3.69675e+07	77034.5	4670.91	2.24512e+06	5.15574e+06	9.06524e+06	40.0002	803980	1.69906e+06	3.57361e+06	100.677	33978.1	1.04349e+07	6.73883e+06	141528	1715.83	2.53341e+06
4	SRM1643-5X	680.021	723088	4.98721e+08	1.31781e+08	3.15274e+06	513032	5.35804e+07	2.51753e+07	5811.38	2.77515e+06	1.12045e+06	568747	67026.2	15092.5	1.70933e+06	245076	6535.08	253657	780770	380976	316148	603398	353170	318438	209730	4050.67	32415.4	1.71726e+07	280.004	497137	1.9978e+06	1.55779e+07	32512.4	1466.76	921550	2.31402e+06	3.67427e+06	16.6668	328130	681538	1.4754e+06	9.9998	16172.4	7.30408e+06	897546	12284.7	1484.27	198763
5	SRM1643-10X	166.668	191142	1.29304e+08	3.40213e+07	920312	508573	1.60898e+07	6.51292e+06	5434.54	776547	299653	174818	20029.4	3887.28	448730	64774.5	1576.77	68045.2	202021	99162.6	84159.4	151021	88089.7	81884.6	53645.1	1266.73	23485.5	1.70993e+07	226.67	128179	514113	3.96611e+06	8696.4	596.683	241705	628485	1.06633e+06	3.33335	88063.9	190359	376299	15.2753	4216.05	1.38873e+06	70319.5	2940.83	4284.33	72912.4
6	SRM1643-20X	93.3341	89517.3	6.15248e+07	1.6432e+07	444287	508883	9.10503e+06	3.08158e+06	5697.98	368646	146306	100668	11822.3	4410.8	220658	79167.3	1983.5	32458.9	96915.3	48290	40730	89550.2	51850.9	46901.6	26127.4	846.7	22376.8	1.72418e+07	286.671	62630.6	249010	2.18048e+06	4107.36	380.007	115388	296513	511444	3.33335	41883.7	86489.8	183531	11.5472	1311.86	811063	53701.3	5056.65	2585.98	23451.3
7	ORF1 WT	3.33335	8629.69	6.5158e+07	757155	309072	517132	3.65429e+06	274594	5474.56	33822.5	11028.3	48604.6	4727.58	12166	22483.7	231653	5858.07	11395.3	810.029	15873.5	11418.6	254065	149665	108079	686.688	416.675	20797.3	1.69363e+07	233.337	840.032	10494.5	91010.8	53.3337	6291.62	1560.1	8089.31	13834.4	6.66669	1943.49	3810.6	96.6674	5.77353	116.839	1.11235e+06	6430.65	3155.81	1148.24	45518.3
8	ORF1 WT	0	11588.8	1.52362e+08	667615	236060	514603	4.35299e+06	267115	5494.56	35383.6	10501.2	50254.4	5217.78	16644.5	22046.2	321507	8052.63	12749.9	663.356	17188.6	23335.2	33321.3	19391.8	14755.4	656.686	340.006	20483.5	1.67994e+07	223.336	1083.38	10307.6	90242.7	16.6667	6825.22	2066.84	8032.62	14188.1	6.66669	1933.49	4237.4	100.001	0	590.649	2.16055e+06	7550.49	1667.32	4231.44	33220.9
9	ORF1 WT	10	9853.93	1.61621e+08	533165	319773	511692	3.61422e+06	238112	5771.37	31503.2	9764	48818.7	4687.57	42512.4	23231.7	806054	19952.7	13240.4	713.357	15022.4	20633.8	35119.4	20443.5	16274	580.015	303.338	20196.4	1.65508e+07	200.002	850.032	10224.2	89825.9	13.3334	3503.84	830.03	7368.88	12810	10	1590.11	3500.51	156.668	0	175.371	2.0457e+06	10223	6821	4981.81	67101.8
10	GAD	6.66669	7625.68	4.07783e+08	467746	194065	507293	3.33464e+06	205910	5741.34	475518	9607.09	49012.9	5024.36	23936.3	22266.6	448772	11288.5	11768.9	800.028	15986.9	32458.9	62556.4	36219.2	27289.8	546.681	396.674	20259.8	1.6539e+07	216.669	840.032	9977.35	82451.8	133.335	4697.56	336.673	8152.7	13877.8	20.0001	2770.32	6241.58	80.0007	11.5471	265.181	3.59771e+06	1134.96	26508.9	3110.7	100608
11	GAD	0	10331	1.0873e+08	873664	297492	513073	3.58499e+06	278698	5728.01	37095.2	9166.74	54455.5	5251.12	34357.3	23071.4	659022	16674.5	13147	753.36	15880.1	25442.6	224181	136337	95665.3	560.015	393.341	19749	1.65771e+07	200.002	923.371	10434.4	86240.6	23.3335	5781.36	1606.78	8126.01	14591.9	0	1946.83	4390.8	46.667	0	222.047	866580	12092.7	3728.89	1768.96	51017.4
12	GAD	0	9166.74	1.10242e+08	419923	175843	507818	3.24454e+06	185105	5507.91	24096.7	8953.27	47246.2	4590.87	19261.6	21355	366323	9230.12	10534.5	703.356	13877.7	26571.7	27012.6	15543	12793.3	496.678	360.007	20046.2	1.65306e+07	173.335	650.02	8843.16	76440.5	13.3334	3207.09	500.012	7522.29	13807.7	0	2746.98	5327.82	90.0008	0	431.295	1.33634e+06	9150.11	1485.77	4120.75	59757.9
13	C483A	6.66669	9033.31	6.61171e+07	549180	346319	514199	3.70177e+06	249552	5624.62	29949.4	8729.78	45345.6	4650.89	16350.8	20266.5	311658	7732.42	11652.1	766.693	15356.2	21261.5	37957.7	21862.5	17181.9	483.345	373.34	19745.6	1.65932e+07	203.336	843.366	11138.3	97358.9	10	5167.76	723.357	8739.75	15239.4	0	1646.78	3437.16	30.0002	5.77353	366.876	309714	7632.33	5688.33	3013.25	65850.2
14	C483A	3.33335	7959.24	1.49906e+08	474518	185816	514076	3.31952e+06	189075	5414.54	25876.9	8126.13	46128.5	4184.05	24216.9	20613.8	454807	11398.6	12226	763.36	15359.5	28402.3	21982.7	12533	10331	470.012	390.007	20764	1.65683e+07	260.003	700.024	10274.3	84018.7	10	3230.43	666.687	8216.05	14191.4	10	1610.11	3757.24	23.3334	5.77353	344.5	1.45618e+06	8299.17	1354.15	4269.8	62145.5
15	C483A	0	7148.78	6.13456e+07	470769	166588	511441	3.0796e+06	173345	5407.86	21521.9	8129.35	46068.3	4357.45	18560.6	18200	348186	8349.48	12072.5	666.687	14952.3	24293.7	12399.5	7018.67	6351.64	513.346	353.34	20186.4	1.67389e+07	213.336	513.347	9900.64	85187	6.66669	2446.92	263.337	7835.81	13991.2	10	2670.3	4870.97	70.0004	0	720.444	420464	6426.26	3385.68	2283.68	37664.2
16	C489A	3.33335	7012.01	9.33824e+07	499521	191868	513005	3.09712e+06	180505	5461.22	23101.4	8116.01	47694.5	4310.77	22183.1	19558.7	410804	10501.1	12683.1	726.691	15783.4	21241.4	19698.9	11281.8	9857.28	463.344	413.341	20039.5	1.67507e+07	216.669	626.685	11375.2	98436.8	10	3147.08	1166.72	8869.87	15730	3.33335	1910.15	3817.26	53.3337	5.77353	521.737	436881	3000.56	1417.85	2382.91	55334
17	C489A	10	8839.84	2.81165e+08	574132	1.9012e+06	511308	8.7855e+06	569016	5718.02	64284.6	7839.21	48159.6	4170.71	33896	24450.7	639274	16030.3	12946.8	816.696	15079.1	23692.5	207231	123542	88244.2	443.343	276.671	19618.8	1.65802e+07	220.003	1686.79	10711.3	90876.7	30.0002	3643.88	443.343	7952.56	13640.9	10.0001	1180.06	2690.3	66.6675	10	395.408	4.16765e+06	3531.76	19356.6	6392.68	75657.7
18	C489A	0	9336.88	6.42281e+08	612331	175853	512661	3.15561e+06	234819	5394.53	62453.1	7482.28	83716.5	8579.65	47972.2	22346.7	905140	22780.9	12900.1	750.026	14328.3	28465.9	29849.1	16871.4	13400.5	490.012	306.672	20283.3	1.67076e+07	250.003	790.03	14725.4	128512	26.6669	3393.81	970.042	9637.09	16150.5	3.33335	1200.06	2450.25	43.3336	0	392.759	4.44901e+06	3184.23	2369.18	825.417	11175.4
19	DDI H2O	0	8282.78	3.15486e+08	433231	195507	506121	3.36091e+06	194233	5921.42	33257.7	7368.91	45750.5	4220.73	39368.8	28653	726459	18777.5	13016.8	890.035	15636.5	36105.6	62506.2	36566.9	27136.2	370.007	373.341	20052.8	1.67358e+07	223.336	580.016	10024.1	87928.9	20.0001	3460.5	330.006	8539.63	15226	0	1446.76	3310.46	46.6669	0	517.753	3.84912e+06	2161.46	6593.69	578.108	88192
20	DDI H2O	0	7839.18	2.62991e+08	421198	181172	505456	3.03269e+06	167901	5621.29	28469.2	7312.21	47333.3	3813.93	26421.4	33444.8	496563	12306.1	13293.8	996.711	16514.3	49521.4	38596.3	22633.9	17348.8	533.347	303.338	20380	1.68236e+07	223.336	573.349	10884.8	91075.3	23.3335	3423.82	300.005	9383.58	16147.2	0	2626.95	5881.41	76.6672	0	268.77	2.32759e+06	5021.21	1177.06	5849.44	58028.8
21	DDI H2O	3.33335	9280.14	3.13197e+08	419305	539010	513606	3.32706e+06	193981	5671.32	36683.9	7175.46	45901.2	3723.91	38405.7	28338.9	727258	18694.1	12830	906.704	14601.9	39950.6	86481.9	49869.6	37396	470.012	320.006	19855.9	1.67394e+07	243.337	663.353	9503.66	80200.3	10	3617.21	1316.74	8189.39	14812.2	26.6668	2010.17	3760.59	33.3335	5.77353	238.789	4.56231e+06	3021.9	7407.68	2829.81	72994.1
22	2% Blank	0	890.037	187836	48430.8	3943.99	509990	2.82097e+06	24226.9	5861.41	2320.23	6891.98	33007.2	2523.6	46.667	3487.17	390.007	13.3334	133.335	220.003	506.679	170.002	1466.76	696.69	1963.49	430.01	330.006	20430.1	1.69987e+07	266.67	53.3337	670.021	2170.2	0	463.463	303.338	70.0006	113.334	3.33335	33.3335	26.6668	6.66669	0	62.4548	3173.37	1631.32	460.208	3535.92	66801
23	SRM1643-1X	3573.86	3.32194e+06	2.32585e+09	6.0463e+08	1.49223e+07	597120	2.47265e+08	1.2473e+08	8452.89	1.34816e+07	5.17418e+06	2.64877e+06	308413	78664	7.56116e+06	1.28242e+06	32900	1.28222e+06	3.50285e+06	1.77785e+06	1.48493e+06	2.80262e+06	1.62352e+06	1.49737e+06	1.05355e+06	18417	77405.9	1.7089e+07	293.338	2.39082e+06	8.51975e+06	7.27472e+07	149950	7018.67	3.99372e+06	1.01194e+07	1.74953e+07	73.3339	1.5051e+06	3.20557e+06	6.26962e+06	276.186	53449.1	3.20484e+06	1.07897e+07	29796.2	3641.29	1.7765e+06
24	SRM1643-2X	1790.13	1.7585e+06	1.22749e+09	3.19801e+08	7.74098e+06	561840	1.29479e+08	6.37687e+07	6378.33	6.875e+06	2.88471e+06	1.3782e+06	160542	41228.1	3.95715e+06	670181	17305.4	676243	1.96206e+06	951697	784043	1.42747e+06	836177	765933	529921	9103.36	48798.6	1.69711e+07	306.671	1.22363e+06	4.34046e+06	3.82498e+07	78654.2	4697.56	2.2862e+06	5.26959e+06	9.34237e+06	40.0002	807241	1.70895e+06	3.56505e+06	78.1126	22432.1	6.41337e+06	664355	97680.7	2999.48	290120
25	SRM1643-5X	6.66669	35865	2.89681e+07	7.48625e+06	194009	148959	4.25388e+06	1.62232e+06	1950.16	196770	80113	44344.8	6115.3	226.67	111407	3790.61	60.0005	3527.19	49142.1	24272.6	21786.1	54832.8	31453.7	29891.3	17570	696.692	26909	2.08494e+07	156.668	30374.3	117564	1.04334e+06	1940.2	76.6671	63829	131125	244094	3.33335	19263.3	40664.6	80057.6	5.77353	14800.6	1.37966e+07	3.81948e+06	96011.5	7010.36	1.6609e+06
26	SRM1643-10X	163.335	76782.8	6.3444e+07	1.7134e+07	441432	155298	8.31146e+06	3.62807e+06	1936.83	435559	173161	85948	12217	3467.17	246431	53966.1	1590.11	55874.1	106001	53267.8	48320.7	110949	64993.1	60030	37125.4	990.046	27938.1	2.12689e+07	180.002	66490.2	266393	2.09466e+06	4601.02	223.337	136981	304933	527530	0	42667.7	88997.9	179821	63.5097	13499.2	9.53348e+06	2.78598e+06	65148.9	11601.9	1.26158e+06
27	SRM1643-20X	26.6669	37210	2.85172e+07	7.22003e+06	188499	133428	4.04739e+06	1.59062e+06	1590.11	184144	79118.4	41587.7	6235.04	543.348	106960	8359.51	210.003	8436.25	46243.5	24202	21211.9	53088.5	31551.9	28605.3	16850.3	713.357	27383.5	2.14756e+07	136.668	29241.5	112367	982316	1860.17	93.3339	60007.7	130074	229840	6.66669	18493.3	39541.1	76213.6	23.0942	9925.3	1.01308e+07	2.73143e+06	70564	6295.31	1.17022e+06
[truncated: 813 more columns]

## Sheet: Primer sequences
Construct	Primer Name	Sequence
HEV Kernow-C1 p6 C483A-Gluc	PU-O-5702	CAGGAGTGCACCGCTTTCCTGGAGCCAGCCGAGGGTTTA
	PU-O-5703	TGGCTCCAGGAAAGCGGTGCACTCCTGCCCTAACCACCG
HEV Kernow-C1 p6 GAD-Gluc	PU-O-2711	CTGCCTTTAAGGGTGCTGATTCGGTGGTCCT
	PU-O-2712	AGGACCACCGAATCAGCACCCTTAAAGGCAG
pSAR55 C483A-Gluc	PU-O-5698	CAGGAGTGCACCGCTTTTCTACAACCTGCAGAAGGCGTCG
	PU-O-5699	AGGTTGTAGAAAAGCGGTGCACTCCTGGCCCAGCCACTTC
pSAR55 GAD-Gluc	PU-O-4635	CTGCCTTTAAAGGTGcTGATTCGATAGTGCT
	PU-O-4636	AGCACTATCGAATCAGCACCTTTAAAGGCAG
pGEM-9Zf-pSHEV3 C483A-Gluc	PU-O-5696	CAGGAGTGTACCGCTTTCTTGGAGCCAGCCGAAGGCTTG
	PU-O-5697	TGGCTCCAAGAAAGCGGTACACTCCTGCCCTAACCACCG
pGEM-9Zf-pSHEV3 GAD-Gluc	PU-O-4376	CCGCCTTCAAGGGTGcTGATTCGGTGGTCCT
	PU-O-4377	AGGACCACCGAATCAGCACCCTTGAAGGCGG
pGEM-7Zf(-)-TW6196E C483A-Gluc	PU-O-5700	CAAGACTGCACCGCTTTTCTTCAGCCTATTGAGGGGAGG
	PU-O-5701	AGGCTGAAGAAAAGCGGTGCAGTCTTGACCTAGCCACCG
pGEM-7Zf(-)-TW6196E GAD-Gluc	PU-O-4631	CGGCATTTAAAGGGGcTGACTCTGTTGTGCT
	PU-O-4632	AGCACAACAGAGTCAGCCCCTTTAAATGCCG
Kernow c1p6 C483S Gluc	PU-O-5893	GGGCAGGAGTGCACCTCCTTCCTGGAGCCAGCCG
	PU-O-5894	GGCTGGCTCCAGGAAGGAGGTGCACTCCTGCCCTAAC
Kernow c1p6 C483C (TGT) Gluc	PU-O-6273	GTGCACCTGTTTCCTGGAGCCAGCCGAGG
	PU-O-6274	AGGAAACAGGTGCACTCCTGCCCTAACCACC
Kernow c1p6 Y590A Gluc	PU-O-5790	GGCCCAGAGCAGGCTGTCCTGTCATTTGACGCCTCCTG
	PU-O-5791	CAAATGACAGGACAGCCTGCTCTGGGCCATTCGCTTCAAG
Kernow c1p6 Y590F Gluc	PU-O-5891	GAATGGCCCAGAGCAGTTTGTCCTGTCATTTGACGC
	PU-O-5892	GTCAAATGACAGGACAAACTGCTCTGGGCCATTCGC
Kernow c1p6 Y590L Gluc	PU-O-5238	GAATGGCCCAGAGCAGCTTGTCCTGTCATTTGAC
	PU-O-5239	GTCAAATGACAGGACAAGCTGCTCTGGGCCATTC
Kernow c1p6 C483G Gluc	PU-O-5240	GGGCAGGAGTGCACCGGCTTCCTGGAGCCAGCC
	PU-O-5241	GGCTGGCTCCAGGAAGCCGGTGCACTCCTGCCC
Kernow c1p6 C483A (GCT) Gluc	PU-O-6060	AGCGGTGCACTCCTGCCCTAACCACCG
	PU-O-6061	CAGGAGTGCACCGCTTTCCTGGAGCCA
Kernow c1p6 C483A (GCA) Gluc	PU-O-6290	CAGGAGTGCACCGCATTCCTGGAGCCA
	PU-O-6291	TGCGGTGCACTCCTGCCCTAACCACCG
Kernow c1p6 C483A (GCG) Gluc	PU-O-6292	CAGGAGTGCACCGCGTTCCTGGAGCCA
	PU-O-6293	CGCGGTGCACTCCTGCCCTAACCACCG
Kernow c1p6 C483A (GCC) Gluc	PU-O-6288	CAGGAGTGCACCGCCTTCCTGGAGCCA
	PU-O-6289	GGCGGTGCACTCCTGCCCTAACCACCG
Kernow c1p6 Q433A C434A R435A Gluc	PU-O-7667	CAGCTCCAGTTTTATGCAGCTGCAGCTCGGTGGCTATCTG
	PU-O-7668	CAGATAGCCACCGAGCTGCAGCTGCATAAAACTGGAGCTG
Kernow c1p6 R436A W437A L438A Gluc	PU-O-7669	GCACAGTGCCGAGCTGCAGCTTCTGCAGGATTCCATCTGG
	PU-O-7670	CCAGATGGAATCCTGCAGAAGCTGCAGCTCGGCACTGTGC
Kernow c1p6 S439A A440A G441A Gluc	PU-O-7671	CACAGTGCCGACGGTGGCTAGCTGCAGCTTTCCATCTGGAC
	PU-O-7672	GTCCAGATGGAAAGCTGCAGCTAGCCACCGTCGGCACTGTG
Kernow c1p6 F442A H443A L444A Gluc	PU-O-7673	GGCTATCTGCAGGAGCTGCAGCTGACCCCAGGGTGCTTG
	PU-O-7674	CAAGCACCCTGGGGTCAGCTGCAGCTCCTGCAGATAGCC
Kernow c1p6 D445A P446A R447A Gluc	PU-O-7675	GCAGGATTCCATCTGGCTGCAGCTGTGCTTGTTTTTGATG
	PU-O-7676	CATCAAAAACAAGCACAGCTGCAGCCAGATGGAATCCTGC
Kernow c1p6 V448A L449A V450A Gluc	PU-O-7677	CAGGATTCCATCTGGACCCCAGGGCTGCAGCTTTTGATGAATCAG
	PU-O-7678	CTGATTCATCAAAAGCTGCAGCCCTGGGGTCCAGATGGAATCCTG
Kernow c1p6 F451A D452A E453A Gluc	PU-O-7679	CCCCAGGGTGCTTGTTGCTGCAGCTTCAGTGCCATGTCG
	PU-O-7680	CGACATGGCACTGAAGCTGCAGCAACAAGCACCCTGGGG
Kernow c1p6 S454A V455A P456A Gluc	PU-O-7681	GGGTGCTTGTTTTTGATGAAGCTGCAGCTTGTCGTTGTAGG
	PU-O-7682	CCTACAACGACAAGCTGCAGCTTCATCAAAAACAAGCACCC
Kernow c1p6 C457A R458A C459A Gluc	PU-O-7683	GATGAATCAGTGCCAGCTGCAGCTAGGACGTTCCTGAAG
	PU-O-7684	CTTCAGGAACGTCCTAGCTGCAGCTGGCACTGATTCATC
Kernow c1p6 R460A T461A F462A Gluc	PU-O-7685	CAGTGCCATGTCGTTGTGCTGCAGCTCTGAAGAAAGTCGC
	PU-O-7686	GCGACTTTCTTCAGAGCTGCAGCACAACGACATGGCACTG
Kernow c1p6 L463A K464A K465A Gluc	PU-O-7687	CGTTGTAGGACGTTCGCTGCAGCTGTCGCGGGTAAATTC
	PU-O-7688	GAATTTACCCGCGACAGCTGCAGCGAACGTCCTACAACG
Kernow c1p6 V466A G468A Gluc	PU-O-7689	CCTGAAGAAAGCTGCAGCTAAATTCTGCTGTTTTATGCGG
	PU-O-7690	CCGCATAAAACAGCAGAATTTAGCTGCAGCTTTCTTCAGG
Kernow c1p6 K469A F470A C471A Gluc	PU-O-7691	GAAGAAAGTCGCGGGTGCTGCAGCTTGTTTTATGCGGTGG
	PU-O-7692	CCACCGCATAAAACAAGCTGCAGCACCCGCGACTTTCTTC
Kernow c1p6 C472A F473A M474A Gluc	PU-O-7693	GAAAGTCGCGGGTAAATTCTGCGCTGCAGCTCGGTGGTTAG
	PU-O-7694	CTAACCACCGAGCTGCAGCGCAGAATTTACCCGCGACTTTC
Kernow c1p6 R475A W476A L477A Gluc	PU-O-7695	CTGCTGTTTTATGGCTGCAGCTGGGCAGGAGTGCACCTGC
	PU-O-7696	GCAGGTGCACTCCTGCCCAGCTGCAGCCATAAAACAGCAG
Kernow c1p6 G478A Q479A E480A Gluc	PU-O-7697	GTTTTATGCGGTGGTTAGCTGCAGCTTGCACCTGCTTCC
	PU-O-7698	GGAAGCAGGTGCAAGCTGCAGCTAACCACCGCATAAAAC
Kernow c1p6 C481A T482A C483A Gluc	PU-O-7699	GGTTAGGGCAGGAGGCTGCAGCTTTCCTGGAGCCAGCCG
	PU-O-7700	CGGCTGGCTCCAGGAAAGCTGCAGCCTCCTGCCCTAACC
Kernow c1p6 484A L485A E486A Gluc	PU-O-7701	GGGCAGGAGTGCACCTGCGCTGCAGCTCCAGCCGAGG
	PU-O-7702	CTCGGCTGGAGCTGCAGCGCAGGTGCACTCCTGCCC
Kernow c1p6 P487A E489A Gluc	PU-O-7703	GCACCTGCTTCCTGGAGGCTGCAGCTGGTTTAGTTGGCG
	PU-O-7704	CGCCAACTAAACCAGCTGCAGCCTCCAGGAAGCAGGTGC
Kernow c1p6 G490A L491A V492A Gluc	PU-O-7705	CCTGGAGCCAGCCGAGGCTGCAGCTGGCGACCATGGCC
	PU-O-7706	GGCCATGGTCGCCAGCTGCAGCCTCGGCTGGCTCCAGG
Kernow c1p6 G493A D494A H495A Gluc	PU-O-7707	CAGCCGAGGGTTTAGTTGCTGCAGCTGGCCATGACAATG
	PU-O-7708	CATTGTCATGGCCAGCTGCAGCAACTAAACCCTCGGCTG
Kernow c1p6 G496A H497A D498A Gluc	PU-O-7709	GTTTAGTTGGCGACCATGCTGCAGCTAATGAGGCTTATG
	PU-O-7710	CATAAGCCTCATTAGCTGCAGCATGGTCGCCAACTAAAC
Kernow c1p6 N499A E500A Gluc	PU-O-7711	GGCCATGACGCTGCAGCTTATGAAGGTTCTGAGGTCGACC
	PU-O-7712	GGTCGACCTCAGAACCTTCATAAGCTGCAGCGTCATGGCC
Kernow c1p6 Y502A E503A G504A Gluc	PU-O-7713	CCATGACAATGAGGCTGCTGCAGCTTCTGAGGTCGACCAG
	PU-O-7714	CTGGTCGACCTCAGAAGCTGCAGCAGCCTCATTGTCATGG
Kernow c1p6 S505A E506A V507A Gluc	PU-O-7715	GGCTTATGAAGGTGCTGCAGCTGACCAGGCTGAACCTGCC
	PU-O-7716	GGCAGGTTCAGCCTGGTCAGCTGCAGCACCTTCATAAGCC
Kernow c1p6 D508A Q509A Gluc	PU-O-7717	GAAGGTTCTGAGGTCGCTGCAGCTGAACCTGCCCATC
	PU-O-7718	GATGGGCAGGTTCAGCTGCAGCGACCTCAGAACCTTC
Kernow c1p6 E511A P512A Gluc	PU-O-7719	GAGGTCGACCAGGCTGCTGCAGCTCATCTTGATGTTTCGG
	PU-O-7720	CCGAAACATCAAGATGAGCTGCAGCAGCCTGGTCGACCTC
Kernow c1p6 H514A L515A D516A Gluc	PU-O-7721	CAGGCTGAACCTGCCGCTGCAGCTGTTTCGGGGACTTATG
	PU-O-7722	CATAAGTCCCCGAAACAGCTGCAGCGGCAGGTTCAGCCTG
Kernow c1p6 V517A S518A G519A Gluc	PU-O-7723	CCTGCCCATCTTGATGCTGCAGCTACTTATGCCGTCCACG
	PU-O-7724	CGTGGACGGCATAAGTAGCTGCAGCATCAAGATGGGCAGG
Kernow c1p6 T520A Y521A Gluc	PU-O-7725	GCCCATCTTGATGTTTCGGGGGCTGCAGCTGTCCACGGGC
	PU-O-7726	GCCCGTGGACAGCTGCAGCCCCCGAAACATCAAGATGGGC
Kernow c1p6 V523A H524A G525A Gluc	PU-O-7727	GTTTCGGGGACTTATGCCGCTGCAGCTCACCAGCTTGTAG
	PU-O-7728	CTACAAGCTGGTGAGCTGCAGCGGCATAAGTCCCCGAAAC
Kernow c1p6 H526A Q527A L528A Gluc	PU-O-7729	GCCGTCCACGGGGCTGCAGCTGTAGCCCTCTATAGGGC
	PU-O-7730	GCCCTATAGAGGGCTACAGCTGCAGCCCCGTGGACGGC
Kernow c1p6 V529A L531A Gluc	PU-O-7731	CCACGGGCACCAGCTTGCTGCAGCTTATAGGGCACTTAATG
	PU-O-7732	CATTAAGTGCCCTATAAGCTGCAGCAAGCTGGTGCCCGTGG
Kernow c1p6 Y532A R533A Gluc	PU-O-7733	CCAGCTTGTAGCCCTCGCTGCAGCTCTTAATGTCCCAC
	PU-O-7734	GTGGGACATTAAGAGCTGCAGCGAGGGCTACAAGCTGG
Kernow c1p6 L535A N536A V537A Gluc	PU-O-7735	GCCCTCTATAGGGCAGCTGCAGCTCCACATGATATTGCCG
	PU-O-7736	CGGCAATATCATGTGGAGCTGCAGCTGCCCTATAGAGGGC
Kernow c1p6 P538A H539A D540A Gluc	PU-O-7737	GGGCACTTAATGTCGCTGCAGCTATTGCCGCTCGAGC
	PU-O-7738	GCTCGAGCGGCAATAGCTGCAGCGACATTAAGTGCCC
Kernow c1p6 I541A Gluc	PU-O-7739	GTCCCACATGATGCTGCAGCTCGAGCTTCCCGATTAACGG
	PU-O-7740	CCGTTAATCGGGAAGCTCGAGCTGCAGCATCATGTGGGAC
Kernow c1p6 R544A S546A Gluc	PU-O-7741	CCCACATGATATTGCCGCTGCTGCAGCTCGATTAACGGC
	PU-O-7742	GCCGTTAATCGAGCTGCAGCAGCGGCAATATCATGTGGG
Kernow c1p6 R547A L548A T549A Gluc	PU-O-7743	GCCGCTCGAGCTTCCGCTGCAGCTGCTACTGTTGAGC
	PU-O-7744	GCTCAACAGTAGCAGCTGCAGCGGAAGCTCGAGCGGC
Kernow c1p6 T551A V552A Gluc	PU-O-7745	CCCGATTAACGGCTGCAGCTGAGCTTGTTGCAGGTCCAG
	PU-O-7746	CTGGACCTGCAACAAGCTCAGCTGCAGCCGTTAATCGGG
Kernow c1p6 E553A L554A V555A Gluc	PU-O-7747	CGGCTACTGTTGCTGCAGCTGCAGGTCCAGACCGCTTGG
	PU-O-7748	CCAAGCGGTCTGGACCTGCAGCTGCAGCAACAGTAGCCG
Kernow c1p6 G557A P558A Gluc	PU-O-7749	CGGCTACTGTTGAGCTTGTTGCTGCAGCTGACCGCTTGGAG
	PU-O-7750	CTCCAAGCGGTCAGCTGCAGCAACAAGCTCAACAGTAGCCG
Kernow c1p6 D559A R560A L561A Gluc	PU-O-7751	GCTTGTTGCAGGTCCAGCTGCAGCTGAGTGCCGCACTGTGC
	PU-O-7752	GCACAGTGCGGCACTCAGCTGCAGCTGGACCTGCAACAAGC
Kernow c1p6 E562A C563A R564A Gluc	PU-O-7753	GGTCCAGACCGCTTGGCTGCAGCTACTGTGCTCGG
	PU-O-7754	CCGAGCACAGTAGCTGCAGCCAAGCGGTCTGGACC
Kernow c1p6 T565A V566A L567A Gluc	PU-O-7755	CCGCTTGGAGTGCCGCACTGTGCTCGGTAATAAGACCTTC
	PU-O-7756	GAAGGTCTTATTACCGAGCACAGTGCGGCACTCCAAGCGG
Kernow c1p6 G568A N569A K570A Gluc	PU-O-7757	GTGCCGCACTGTGCTCGCTGCAGCTACCTTCCGGACGACG
	PU-O-7758	CGTCGTCCGGAAGGTAGCTGCAGCGAGCACAGTGCGGCAC
Kernow c1p6 T571A F572A R573A Gluc	PU-O-7759	GCTCGGTAATAAGGCTGCAGCTACGACGGTGGTTGATGGC
	PU-O-7760	GCCATCAACCACCGTCGTAGCTGCAGCCTTATTACCGAGC
Kernow c1p6 T574A T575A V576A Gluc	PU-O-7761	GTAATAAGACCTTCCGGGCTGCAGCTGTTGATGGCGCCC
	PU-O-7762	GGGCGCCATCAACAGCTGCAGCCCGGAAGGTCTTATTAC
Kernow c1p6 V577A D578A G579A Gluc	PU-O-7763	GTAATAAGACCTTCCGGACGACGGTGGCTGCAGCTGCCCATCTTG
	PU-O-7764	CAAGATGGGCAGCTGCAGCCACCGTCGTCCGGAAGGTCTTATTAC
Kernow c1p6 H581A L582A Gluc	PU-O-7765	CGGTGGTTGATGGCGCTGCAGCTGAAGCGAATGGCCCAG
	PU-O-7766	CTGGGCCATTCGCTTCAGCTGCAGCGCCATCAACCACCG
Kernow c1p6 E583A N585A Gluc	PU-O-7767	GATGGCGCCCATCTTGCTGCAGCTGGCCCAGAGCAGTATG
	PU-O-7768	CATACTGCTCTGGGCCAGCTGCAGCAAGATGGGCGCCATC
Kernow c1p6 G586A P587A E588A Gluc	PU-O-7769	CCCATCTTGAAGCGAATGCTGCAGCTCAGTATGTCCTGTC
	PU-O-7770	GACAGGACATACTGAGCTGCAGCATTCGCTTCAAGATGGG
Kernow c1p6 Q589A Y590A V591A Gluc	PU-O-7771	GCGAATGGCCCAGAGGCTGCAGCTCTGTCATTTGACGCC
	PU-O-7772	GGCGTCAAATGACAGAGCTGCAGCCTCTGGGCCATTCGC
Kernow c1p6 Y590A V591A L592A Gluc	PU-O-7773	GGCCCAGAGCAGGCTGCAGCTTCATTTGACGCCTCCTGTC
	PU-O-7774	GACAGGAGGCGTCAAATGAAGCTGCAGCCTGCTCTGGGCC
Kernow c1p6 C434A Gluc	PU-O-7775	CCAGTTTTATGCACAGGCCCGACGGTGGCTATCTGCAGG
	PU-O-7776	CCTGCAGATAGCCACCGTCGGGCCTGTGCATAAAACTGG
Kernow c1p6 C457A Gluc	PU-O-7777	GATGAATCAGTGCCAGCTCGTTGTAGGACGTTCCTGAAG
	PU-O-7778	CTTCAGGAACGTCCTACAACGAGCTGGCACTGATTCATC
Kernow c1p6 C459A Gluc	PU-O-7779	GAATCAGTGCCATGTCGTGCTAGGACGTTCCTGAAG
	PU-O-7780	CTTCAGGAACGTCCTAGCACGACATGGCACTGATTC
Kernow c1p6 C471A Gluc	PU-O-7781	GAAAGTCGCGGGTAAATTCGCCTGTTTTATGCGGTGGTTAG
	PU-O-7782	CTAACCACCGCATAAAACAGGCGAATTTACCCGCGACTTTC
Kernow c1p6 C472A Gluc	PU-O-7783	GTCGCGGGTAAATTCTGCGCTTTTATGCGGTGGTTAGGG
	PU-O-7784	CCCTAACCACCGCATAAAAGCGCAGAATTTACCCGCGAC
Kernow c1p6 C481A Gluc	PU-O-7785	GCGGTGGTTAGGGCAGGAGGCCACCTGCTTCCTGGAGCC
	PU-O-7786	GGCTCCAGGAAGCAGGTGGCCTCCTGCCCTAACCACCGC
Kernow c1p6 C563A Gluc	PU-O-7787	GCAGGTCCAGACCGCTTGGAGGCCCGCACTGTGCTCGG
	PU-O-7788	CCGAGCACAGTGCGGGCCTCCAAGCGGTCTGGACCTGC
Kernow c1p6 D248A Gluc	PU-O-10292	CTACTAAAATAGTTGGTGCCCACCCGTTGGTTATAGAGCGTG
	PU-O-10293	CCAACGGGTGGGCACCAACTATTTTAGTAGTACGGATCC
Kernow c1p6 H249A Gluc	PU-O-10294	CGTACTACTAAAATAGTTGGTGACGCCCCGTTGGTTATAGAGC
	PU-O-10295	GCCCGCACACGCTCTATAACCAACGGGGCGTCACCAACTATTTTAG
AAAPG-HA tag-AAAPG from pLVX ORF2-HA	PU-O-9180	GCTGCCCCGGGGGCGGCCGCACCAGGAtacccatacgat
	PU-O-9183	GGTAGGGTGGGGCAGTCCTGGTGCGGCCGCagcgtaatctg
PCR linearize p6/BSR-2A-ZsGreen insert AAAPG-HA tag-AAAPG	PU-O-9229	CTGCCCCACCCTACCCCGCCTGCTAGTGATATTTGGGCGTTAC
	PU-O-9228	CCCCCGGGGCAGCAGCCGAAGCAGGGGCGG
PCR linearize Kernow C1/p6 Gluc insert AAAPG-HA tag-AAAPG	PU-O-9229	CTGCCCCACCCTACCCCGCCTGCTAGTGATATTTGGGCGTTAC
	PU-O-9228	CCCCCGGGGCAGCAGCCGAAGCAGGGGCGG
ORF1 AAAPG-HA tag-AAAPG	PU-O-9907	CGGTGAATTCCTCGAGGGCAGACCACGTATGTGGTCGATGC
	PU-O-9908	CCGCGGCCGCTCTAGAGGTGATCCCATGGGCGATGCA
